# Supplementary material
Source: publisher site journal article supplement (https://www.dovepress.com/article/313212)
Supplement: Supplementary file 1 [file get_supplementary_file.php]

**SUPPLEMENTARY MATERIALS**

**APPENDIX 1.** List of codes used in this study.

| Coding system | Code | Description | Defined |
| --- | --- | --- | --- |
| The initial codes that used to identify patients with Parkinson disease from SAIL databank (The first step). | | | |
| Read codes (version 2) | F12..00 | Parkinson's disease | Definite diagnosis of Parkinson’s |
| Read codes (version 2) | F120.00 | Paralysis agitans | Definite diagnosis of Parkinson’s |
| Read codes (version 2) | F12z.00 | Parkinson's disease not otherwise specified | Definite diagnosis of Parkinson’s |
| Read codes (version 2) | 147F.00 | History of Parkinson's disease | Definite diagnosis of Parkinson’s |
| Read codes (version 2) | 2987 | On examination: Parkinson flexion posture | Suggestive diagnosis of Parkinson’s |
| Read codes (version 2) | 2987.11 | On examination: Parkinson posture | Suggestive diagnosis of Parkinson’s |
| Read codes (version 2) | 2994 | On examination: festination/Parkinson gait | Suggestive diagnosis of Parkinson’s |
| Read codes (version 2) | 2994.11 | On examination: Parkinson gait | Suggestive diagnosis of Parkinson’s |
| Read codes (version 2) | 297A.00 | On examination: Parkinsonian tremor | Suggestive diagnosis of Parkinson’s |
| Read codes (version 2) | 8T06.00 | Referral to Parkinson's service | Suggestive diagnosis of Parkinson’s |
| Read codes (version 2) | 8T06000 | Referral to community Parkinson's service | Suggestive diagnosis of Parkinson’s |
| Read codes (version 2) | TJ64z00 | Adverse Reaction to Anti-Parkinsonism Drugs not otherwise specified | Suggestive diagnosis of Parkinson’s |
| Read codes (version 2) | U606711 | [X] Adverse reaction to anti-parkinsonism drug | Suggestive diagnosis of Parkinson’s |
| Read codes (version 2) | U606712 | [X] Adverse reaction to amantadine | Suggestive diagnosis of Parkinson’s |
| Read codes (version 2) | U606713 | [X] Adverse reaction to levodopa, L-dopa | Suggestive diagnosis of Parkinson’s |
| Read codes (version 2) | U606714 | [X] Adverse reaction to trihexyphenidyl | Suggestive diagnosis of Parkinson’s |
| Read codes (version 2) | U606718 | [X] Adverse reaction to anti-parkinsonism drugs not otherwise specified | Suggestive diagnosis of Parkinson’s |
| Read codes (version 2) | F1303 | Parkinsonism and orthostatic hypotension | Suggestive diagnosis of Parkinson’s |
| Read codes (version 2) | dq… | Dopaminergic drugs | Parkinson’s medications |
| Read codes (version 2) | dq1.. | Levodopa | Parkinson’s medications |
| Read codes (version 2) | dq11. | Levodopa 125mg capsule | Parkinson’s medications |
| Read codes (version 2) | dq12. | Levodopa 250mg capsule | Parkinson’s medications |
| Read codes (version 2) | dq13. | Levodopa 500mg capsule | Parkinson’s medications |
| Read codes (version 2) | dq14. | Levodopa 500mg tablet | Parkinson’s medications |
| Read codes (version 2) | dq2.. | Levodopa with benserazide / Co-benedopa / Madopar | Parkinson’s medications |
| Read codes (version 2) | dq21. | Madopar 62.5 capsule | Parkinson’s medications |
| Read codes (version 2) | dq22. | Madopar 125 capsule | Parkinson’s medications |
| Read codes (version 2) | dq23. | Madopar 250 capsule | Parkinson’s medications |
| Read codes (version 2) | dq24. | Madopar 62.5 disp tablet | Parkinson’s medications |
| Read codes (version 2) | dq25. | Madopar 125 dispersible tablet | Parkinson’s medications |
| Read codes (version 2) | dq26. | Madopar CR 125 m/r capsule | Parkinson’s medications |
| Read codes (version 2) | dq27. | Co-beneldopa 12.5mg/50mg cap | Parkinson’s medications |
| Read codes (version 2) | dq28. | Co-beneldopa 25mg/100mg cap | Parkinson’s medications |
| Read codes (version 2) | dq29. | Co-beneldopa 50mg/200mg cap | Parkinson’s medications |
| Read codes (version 2) | dq2a. | Co-benel 12.5mg/50mg disp tab | Parkinson’s medications |
| Read codes (version 2) | dq2b. | Co-benel 25mg/100mg m/r cap | Parkinson’s medications |
| Read codes (version 2) | dq2c. | Co-benel 25mg/100mg disp tab | Parkinson’s medications |
| Read codes (version 2) | dq3.. | Levodopa with carbidopa/ Co-careldopa / Sinemet | Parkinson’s medications |
| Read codes (version 2) | dq3.. | Levodopa with carbidopa | Parkinson’s medications |
| Read codes (version 2) | dq31. | Sinemet-110 tablet | Parkinson’s medications |
| Read codes (version 2) | dq32. | Sinemet-275 tablet | Parkinson’s medications |
| Read codes (version 2) | dq33. | Sinemet-Plus tablet | Parkinson’s medications |
| Read codes (version 2) | dq34. | Sinemet-LS tablet | Parkinson’s medications |
| Read codes (version 2) | dq34. | Sinemet-62.5 tablet | Parkinson’s medications |
| Read codes (version 2) | dq35. | Co-careldopa 12.5mg/50mg tab | Parkinson’s medications |
| Read codes (version 2) | dq36. | Co-careldopa 10mg/100mg tablet | Parkinson’s medications |
| Read codes (version 2) | dq37. | Co-careldopa 25mg/100mg tablet | Parkinson’s medications |
| Read codes (version 2) | dq38. | Co-careldopa 25mg/250mg tablet | Parkinson’s medications |
| Read codes (version 2) | dq39. | Sinemet CR m/r tablet | Parkinson’s medications |
| Read codes (version 2) | dq3A. | Half-Sinemet CR m/r tablet | Parkinson’s medications |
| Read codes (version 2) | dq3a. | Co-careldop 50mg/200mg m/r tab | Parkinson’s medications |
| Read codes (version 2) | dq3B. | Stalevo 50mg/12.5mg/200mg tab | Parkinson’s medications |
| Read codes (version 2) | dq3b. | Co-careldop 25mg/100mg m/r tab | Parkinson’s medications |
| Read codes (version 2) | dq3C. | Stalevo 100mg/25mg/200mg tab | Parkinson’s medications |
| Read codes (version 2) | dq3c. | STANEK 175/43.75/200mg tablets | Parkinson’s medications |
| Read codes (version 2) | dq3D. | Stalevo 150mg/37.5mg/200mg tab | Parkinson’s medications |
| Read codes (version 2) | dq3d. | STANEK 200mg/50mg/200mg tabs | Parkinson’s medications |
| Read codes (version 2) | dq3E. | Tilolec 100mg/25mg m/r tablet | Parkinson’s medications |
| Read codes (version 2) | dq3F. | Tilolec 200mg/50mg m/r tablet | Parkinson’s medications |
| Read codes (version 2) | dq3G. | Duodopa 5mg/20mg/mL gel 100mL | Parkinson’s medications |
| Read codes (version 2) | dq3H. | CARAMET CR 25mg/100mg m/r tabs | Parkinson’s medications |
| Read codes (version 2) | dq3I. | CARAMET CR 50mg/200mg m/r tabs | Parkinson’s medications |
| Read codes (version 2) | dq3J. | STALEVO 200mg/50mg/200mg tabs | Parkinson’s medications |
| Read codes (version 2) | dq3K. | STALEVO 125/31.25/200mg tabs | Parkinson’s medications |
| Read codes (version 2) | dq3L. | STALEVO 75/18.75/200mg tablets | Parkinson’s medications |
| Read codes (version 2) | dq3M. | STALEVO 175/43.75/200mg tabs | Parkinson’s medications |
| Read codes (version 2) | dq3N. | SASTRAVI 50/12.5/200mg tablets | Parkinson’s medications |
| Read codes (version 2) | dq3O. | SASTRAVI 75/18.75/200mg tabs | Parkinson’s medications |
| Read codes (version 2) | dq3P. | SASTRAVI 100mg/25mg/200mg tabs | Parkinson’s medications |
| Read codes (version 2) | dq3Q. | SASTRAVI 125/31.25/200mg tabs | Parkinson’s medications |
| Read codes (version 2) | dq3R. | SASTRAVI 150/37.5/200mg tabs | Parkinson’s medications |
| Read codes (version 2) | dq3S. | SASTRAVI 175/43.75/200mg tabs | Parkinson’s medications |
| Read codes (version 2) | dq3s. | L-DOPA/CARB/ENTAC 418.75mg tab | Parkinson’s medications |
| Read codes (version 2) | dq3T. | SASTRAVI 200mg/50mg/200mg tabs | Parkinson’s medications |
| Read codes (version 2) | dq3t. | L-DOPA/CARB/ENTAC 293.75mg tab | Parkinson’s medications |
| Read codes (version 2) | dq3U. | STANEK 50mg/12.5mg/200mg tabs | Parkinson’s medications |
| Read codes (version 2) | dq3u. | L-DOPA/CARB/ENTAC 356.25mg tab | Parkinson’s medications |
| Read codes (version 2) | dq3V. | STANEK 75mg/18.75mg/200mg tabs | Parkinson’s medications |
| Read codes (version 2) | dq3v. | L-DOPA/CARBI/ENTAC 450mg tabs | Parkinson’s medications |
| Read codes (version 2) | dq3w. | Co-careldo 5/20mg/mL gel 100mL | Parkinson’s medications |
| Read codes (version 2) | dq3w. | Carbi/Levodo 5/20mg/mL 100mL | Parkinson’s medications |
| Read codes (version 2) | dq3X. | STANEK 100mg/25mg/200mg tabs | Parkinson’s medications |
| Read codes (version 2) | dq3x. | L-dopa/carbi/entac 387.5mg tab | Parkinson’s medications |
| Read codes (version 2) | dq3Y. | STANEK 125/31.25/200mg tablets | Parkinson’s medications |
| Read codes (version 2) | dq3y. | L-dopa/carbi/entac 325mg tab | Parkinson’s medications |
| Read codes (version 2) | dq3Z. | STANEK 150mg/37.5mg/200mg tabs | Parkinson’s medications |
| Read codes (version 2) | dq3z. | L-dopa/carbi/entac 262.5mg tab | Parkinson’s medications |
| Read codes (version 2) | dq4.. | Amantadine | Parkinson’s medications |
| Read codes (version 2) | dq41. | Symmetrel [park] 100mg capsule | Parkinson’s medications |
| Read codes (version 2) | dq42. | Symmetrel [park] 50mg/5ml syr | Parkinson’s medications |
| Read codes (version 2) | dq43. | Mantadine 100mg capsule | Parkinson’s medications |
| Read codes (version 2) | dq44. | Amantadine HCl 50mg/5mL syrup | Parkinson’s medications |
| Read codes (version 2) | dq4z. | Amantadine HCl 100mg capsule | Parkinson’s medications |
| Read codes (version 2) | dq5.. | Bromocriptine | Parkinson’s medications |
| Read codes (version 2) | dq5.. | Bromocriptine [parkinsons] | Parkinson’s medications |
| Read codes (version 2) | dq51. | Parlodel [park] 1mg tablets | Parkinson’s medications |
| Read codes (version 2) | dq52. | Parlodel [park] 2.5mg tablets | Parkinson’s medications |
| Read codes (version 2) | dq53. | Parlodel [park] 5mg capsule | Parkinson’s medications |
| Read codes (version 2) | dq54. | Parlodel [park] 10mg capsules | Parkinson’s medications |
| Read codes (version 2) | dq55. | Parlodel starter | Parkinson’s medications |
| Read codes (version 2) | dq56. | Bromocriptine [park] 1mg tabs | Parkinson’s medications |
| Read codes (version 2) | dq57. | Bromocriptine [park] 5mg caps | Parkinson’s medications |
| Read codes (version 2) | dq5y. | Bromocriptine 2.5mg tablet | Parkinson’s medications |
| Read codes (version 2) | dq5z. | Bromocriptine 10mg capsule | Parkinson’s medications |
| Read codes (version 2) | dq6.. | Selegiline | Parkinson’s medications |
| Read codes (version 2) | dq61. | Eldepryl 5mg tablet | Parkinson’s medications |
| Read codes (version 2) | dq62. | Eldepryl 10mg tablet | Parkinson’s medications |
| Read codes (version 2) | dq63. | Eldepryl 10mg/5mL syrup | Parkinson’s medications |
| Read codes (version 2) | dq64. | Vivapryl 5mg tablet | Parkinson’s medications |
| Read codes (version 2) | dq65. | Vivapryl 10mg tablet | Parkinson’s medications |
| Read codes (version 2) | dq66. | Stilline 5mg tablet | Parkinson’s medications |
| Read codes (version 2) | dq67. | Stilline 10mg tablet | Parkinson’s medications |
| Read codes (version 2) | dq68. | Centrapryl 5 tablet | Parkinson’s medications |
| Read codes (version 2) | dq69. | Centrapryl 10 tablet | Parkinson’s medications |
| Read codes (version 2) | dq6A. | Zelapar 1.25mg tablet | Parkinson’s medications |
| Read codes (version 2) | dq6w. | Selegiline HCl 1.25mg tablet | Parkinson’s medications |
| Read codes (version 2) | dq6x. | Selegiline HCl 10mg/5mL syrup | Parkinson’s medications |
| Read codes (version 2) | dq6y. | Selegiline HCl 10mg tablet | Parkinson’s medications |
| Read codes (version 2) | dq6z. | Selegiline HCl 5mg tablet | Parkinson’s medications |
| Read codes (version 2) | dq7.. | Lisuride maleate | Parkinson’s medications |
| Read codes (version 2) | dq71. | Lisuride maleate 200mcg tablet | Parkinson’s medications |
| Read codes (version 2) | dq72. | Revanil 200micrograms tablet | Parkinson’s medications |
| Read codes (version 2) | dq8.. | Pergolide mesylate | Parkinson’s medications |
| Read codes (version 2) | dq81. | Pergolide 50micrograms tablet | Parkinson’s medications |
| Read codes (version 2) | dq82. | Pergolide 250micrograms tablet | Parkinson’s medications |
| Read codes (version 2) | dq83. | Pergolide 1mg tablet | Parkinson’s medications |
| Read codes (version 2) | dq84. | Celance 50micrograms tablet | Parkinson’s medications |
| Read codes (version 2) | dq85. | Celance 250micrograms tablet | Parkinson’s medications |
| Read codes (version 2) | dq86. | Celance 1mg tablet | Parkinson’s medications |
| Read codes (version 2) | dq87. | Celance 50mcg starter pack | Parkinson’s medications |
| Read codes (version 2) | dq88. | Pergolide 50mcg starter pack | Parkinson’s medications |
| Read codes (version 2) | dq89. | Pergolide 50+250mcg start pack | Parkinson’s medications |
| Read codes (version 2) | dq8A. | Celance 50+250mcg starter pack | Parkinson’s medications |
| Read codes (version 2) | dq9.. | Apomorphine hydrochloride | Parkinson’s medications |
| Read codes (version 2) | dq91. | Britaject 20mg/2mL injection | Parkinson’s medications |
| Read codes (version 2) | dq92. | Apomorphine HCl 20mg/2mL inj | Parkinson’s medications |
| Read codes (version 2) | dq93. | Britaject 50mg/5mL injection | Parkinson’s medications |
| Read codes (version 2) | dq94. | Apomorphine HCl 50mg/5mL inj | Parkinson’s medications |
| Read codes (version 2) | dq95. | Apomorphine HCl 30mg/3mL pen | Parkinson’s medications |
| Read codes (version 2) | dq96. | Britaject 30mg/3mL pen | Parkinson’s medications |
| Read codes (version 2) | dq97. | APO-go 20mg/2mL injection | Parkinson’s medications |
| Read codes (version 2) | dq98. | APO-go 50mg/5mL injection | Parkinson’s medications |
| Read codes (version 2) | dq99. | APO-go 30mg/3mL prefilled pen | Parkinson’s medications |
| Read codes (version 2) | dq9A. | APO-go PFS 50mg/10mL inj soln | Parkinson’s medications |
| Read codes (version 2) | dq9z. | Apomorphine HCl 50mg/10mL pfs | Parkinson’s medications |
| Read codes (version 2) | dqA.. | Ropinirole hydrochloride | Parkinson’s medications |
| Read codes (version 2) | dqA1. | Ropinirole 0.25mg tablet | Parkinson’s medications |
| Read codes (version 2) | dqA2. | Ropinirole 1mg tablet | Parkinson’s medications |
| Read codes (version 2) | dqA3. | Ropinirole 2mg tablet | Parkinson’s medications |
| Read codes (version 2) | dqA4. | Ropinirole 5mg tablet | Parkinson’s medications |
| Read codes (version 2) | dqA5. | ReQuip 0.25mg tablet | Parkinson’s medications |
| Read codes (version 2) | dqA6. | ReQuip 1mg tablet | Parkinson’s medications |
| Read codes (version 2) | dqA7. | ReQuip 2mg tablet | Parkinson’s medications |
| Read codes (version 2) | dqA8. | ReQuip 5mg tablet | Parkinson’s medications |
| Read codes (version 2) | dqA9. | Ropinirole 250+500+1000mcg pck | Parkinson’s medications |
| Read codes (version 2) | dqAA. | EPPINIX XL 3mg m/r tablets | Parkinson’s medications |
| Read codes (version 2) | dqAa. | Ropinirole 0.5mg+1mg+2mg pack | Parkinson’s medications |
| Read codes (version 2) | dqAB. | EPPINIX XL 4mg m/r tablets | Parkinson’s medications |
| Read codes (version 2) | dqAb. | ReQuip tablet starter pack | Parkinson’s medications |
| Read codes (version 2) | dqAC. | EPPINIX XL 6mg m/r tablets | Parkinson’s medications |
| Read codes (version 2) | dqAc. | ReQuip tablet follow-on pack | Parkinson’s medications |
| Read codes (version 2) | dqAD. | EPPINIX XL 8mg m/r tablets | Parkinson’s medications |
| Read codes (version 2) | dqAd. | ADARTREL 2mg tablets | Parkinson’s medications |
| Read codes (version 2) | dqAe. | ROPINIROLE 500mcg tablets | Parkinson’s medications |
| Read codes (version 2) | dqAf. | ADARTREL 500micrograms tablets | Parkinson’s medications |
| Read codes (version 2) | dqAg. | REQUIP XL 2mg m/r tablets | Parkinson’s medications |
| Read codes (version 2) | dqAh. | REQUIP XL 4mg m/r tablets | Parkinson’s medications |
| Read codes (version 2) | dqAi. | REQUIP XL 8mg m/r tablets | Parkinson’s medications |
| Read codes (version 2) | dqAj. | ROPINIROLE 2mg m/r tablets | Parkinson’s medications |
| Read codes (version 2) | dqAk. | ROPINIROLE 4mg m/r tablets | Parkinson’s medications |
| Read codes (version 2) | dqAl. | ROPINIROLE 8mg m/r tablets | Parkinson’s medications |
| Read codes (version 2) | dqAm. | REPINEX XL 2mg m/r tablets | Parkinson’s medications |
| Read codes (version 2) | dqAn. | REPINEX XL 4mg m/r tablets | Parkinson’s medications |
| Read codes (version 2) | dqAo. | REPINEX XL 8mg m/r tablets | Parkinson’s medications |
| Read codes (version 2) | dqAp. | RAPONER XL 2mg m/r tablets | Parkinson’s medications |
| Read codes (version 2) | dqAq. | RAPONER XL 3mg m/r tablets | Parkinson’s medications |
| Read codes (version 2) | dqAr. | ROPINIROLE 3mg m/r tablets | Parkinson’s medications |
| Read codes (version 2) | dqAs. | RAPONER XL 4mg m/r tablets | Parkinson’s medications |
| Read codes (version 2) | dqAt. | RAPONER XL 6mg m/r tablets | Parkinson’s medications |
| Read codes (version 2) | dqAu. | ROPINIROLE 6mg m/r tablets | Parkinson’s medications |
| Read codes (version 2) | dqAv. | RAPONER XL 8mg m/r tablets | Parkinson’s medications |
| Read codes (version 2) | dqAw. | AIMPART XL 2mg m/r tablets | Parkinson’s medications |
| Read codes (version 2) | dqAx. | AIMPART XL 4mg m/r tablets | Parkinson’s medications |
| Read codes (version 2) | dqAy. | AIMPART XL 8mg m/r tablets | Parkinson’s medications |
| Read codes (version 2) | dqAz. | EPPINIX XL 2mg m/r tablets | Parkinson’s medications |
| Read codes (version 2) | dqB.. | Cabergoline | Parkinson’s medications |
| Read codes (version 2) | dqB1. | Cabergoline 1mg tablet | Parkinson’s medications |
| Read codes (version 2) | dqB2. | Cabergoline 2mg tablet | Parkinson’s medications |
| Read codes (version 2) | dqB3. | Cabergoline 4mg tablet | Parkinson’s medications |
| Read codes (version 2) | dqB4. | Cabaser 1mg tablet | Parkinson’s medications |
| Read codes (version 2) | dqB5. | Cabaser 2mg tablet | Parkinson’s medications |
| Read codes (version 2) | dqB6. | Cabaser 4mg tablet | Parkinson’s medications |
| Read codes (version 2) | dqC.. | Tolcapone | Parkinson’s medications |
| Read codes (version 2) | dqC1. | Tolcapone 100mg tablet | Parkinson’s medications |
| Read codes (version 2) | dqC2. | Tolcapone 200mg tablet | Parkinson’s medications |
| Read codes (version 2) | dqC3. | Tasmar 100mg tablet | Parkinson’s medications |
| Read codes (version 2) | dqC4. | Tasmar 200mg tablet | Parkinson’s medications |
| Read codes (version 2) | dqD.. | Entacapone | Parkinson’s medications |
| Read codes (version 2) | dqD1. | Entacapone 200mg tablet | Parkinson’s medications |
| Read codes (version 2) | dqD2. | Comtess 200mg tablet | Parkinson’s medications |
| Read codes (version 2) | dqE.. | Pramipexole | Parkinson’s medications |
| Read codes (version 2) | dqE1. | Mirapexin 0.088mg tablet | Parkinson’s medications |
| Read codes (version 2) | dqE2. | Mirapexin 0.18mg tablet | Parkinson’s medications |
| Read codes (version 2) | dqE3. | Mirapexin 0.7mg tablet | Parkinson’s medications |
| Read codes (version 2) | dqE4. | MIRAPEXIN 350mcg tablets | Parkinson’s medications |
| Read codes (version 2) | dqE5. | MIRAPEXIN 260mcg m/r tablets | Parkinson’s medications |
| Read codes (version 2) | dqE6. | MIRAPEXIN 520mcg m/r tablets | Parkinson’s medications |
| Read codes (version 2) | dqE7. | MIRAPEXIN 1.05mg m/r tablets | Parkinson’s medications |
| Read codes (version 2) | dqE8. | MIRAPEXIN 2.1mg m/r tablets | Parkinson’s medications |
| Read codes (version 2) | dqE9. | MIRAPEXIN 3.15mg m/r tablets | Parkinson’s medications |
| Read codes (version 2) | dqEA. | MIRAPEXIN 1.57mg m/r tablets | Parkinson’s medications |
| Read codes (version 2) | dqEB. | MIRAPEXIN 2.62mg m/r tablets | Parkinson’s medications |
| Read codes (version 2) | dqEo. | PRAMIPEXOLE 1.1mg tablets | Parkinson’s medications |
| Read codes (version 2) | dqEp. | PRAMIPEXOLE 2.62mg m/r tablets | Parkinson’s medications |
| Read codes (version 2) | dqEq. | PRAMIPEXOLE 1.57mg m/r tablets | Parkinson’s medications |
| Read codes (version 2) | dqEr. | PRAMIPEXOLE 3.15mg m/r tablets | Parkinson’s medications |
| Read codes (version 2) | dqEs. | PRAMIPEXOLE 2.1mg m/r tablets | Parkinson’s medications |
| Read codes (version 2) | dqEt. | PRAMIPEXOLE 1.05mg m/r tablets | Parkinson’s medications |
| Read codes (version 2) | dqEu. | PRAMIPEXOLE 520mcg m/r tablets | Parkinson’s medications |
| Read codes (version 2) | dqEv. | PRAMIPEXOLE 260mcg m/r tablets | Parkinson’s medications |
| Read codes (version 2) | dqEw. | PRAMIPEXOLE 350mcg tablets | Parkinson’s medications |
| Read codes (version 2) | dqEx. | Pramipexole 0.088mg tablet | Parkinson’s medications |
| Read codes (version 2) | dqEx. | Pramipexole HCl 0.125mg tablet | Parkinson’s medications |
| Read codes (version 2) | dqEy. | Pramipexole 0.18mg tablet | Parkinson’s medications |
| Read codes (version 2) | dqEy. | Pramipexole HCl 0.25mg tablet | Parkinson’s medications |
| Read codes (version 2) | dqEz. | Pramipexole 0.7mg tablet | Parkinson’s medications |
| Read codes (version 2) | dqEz. | Pramipexole HCl 1mg tablet | Parkinson’s medications |
| Read codes (version 2) | dqF.. | Rasagiline | Parkinson’s medications |
| Read codes (version 2) | dqFz. | Rasagiline 1mg tablet | Parkinson’s medications |
| Read codes (version 2) | dqG.. | Rotigotine | Parkinson’s medications |
| Read codes (version 2) | dqGt. | ROTIGOTINE 3mg/24hours patches | Parkinson’s medications |
| Read codes (version 2) | dqGu. | ROTIGOTINE 1mg/24hours patches | Parkinson’s medications |
| Read codes (version 2) | dqGv. | Rotigotine 2+4+6+8mg pack | Parkinson’s medications |
| Read codes (version 2) | dqGw. | Rotigotine 8mg/24hours patch | Parkinson’s medications |
| Read codes (version 2) | dqGx. | Rotigotine 6mg/24hours patch | Parkinson’s medications |
| Read codes (version 2) | dqGy. | Rotigotine 4mg/24hours patch | Parkinson’s medications |
| Read codes (version 2) | dqGz. | Rotigotine 2mg/24hours patch | Parkinson’s medications |
| Read codes (version 2) | dr… | Anticholinergics | Parkinson’s medications |
| Read codes (version 2) | dr1.. | Trihexyphenidyl hydrochloride | Parkinson’s medications |
| Read codes (version 2) | dr1w. | Trihexyphenidyl HCl 2mg tablet | Parkinson’s medications |
| Read codes (version 2) | dr1x. | Trihexyphenidyl HCl 5mg tablet | Parkinson’s medications |
| Read codes (version 2) | dr2.. | Orphenadrine hydrochloride | Parkinson’s medications |
| Read codes (version 2) | dr2w. | Orphenadrine HCl 50mg/5mL syr | Parkinson’s medications |
| Read codes (version 2) | dr2x. | Orphenadrine HCl 25mg/5mL liq | Parkinson’s medications |
| Read codes (version 2) | dr2y. | Orphenadrine HCl 50mg tablet | Parkinson’s medications |
| Read codes (version 2) | dr3.. | Benztropine mesylate | Parkinson’s medications |
| Read codes (version 2) | dr3y. | Benztropine mesylate 2mg tab | Parkinson’s medications |
| Read codes (version 2) | dr6.. | Procyclidine hydrochloride | Parkinson’s medications |
| Read codes (version 2) | dr6w. | Procyclidine 2.5mg/5mL syrup | Parkinson’s medications |
| Read codes (version 2) | dr6x. | Procyclidine 5mg/5mL s/f syrup | Parkinson’s medications |
| Read codes (version 2) | dr6y. | Procyclidine HCl 5mg tablet | Parkinson’s medications |
| Read codes (version 2) | dr6z. | Procyclidine HCl 10mg/2mL inj | Parkinson’s medications |
| Codes used to exclude patients with secondary Parkinsonism or Parkinson-plus syndrome (applied after the initial extraction of PD cases in the first step. | | | |
| Read codes (version 2) | F124. | Vascular parkinsonism | Exclusion criteria (secondary Parkinsonism) |
| Read codes (version 2) | A94y1 | Syphilitic parkinsonism | Exclusion criteria (secondary Parkinsonism) |
| Read codes (version 2) | F121. | Drug induced parkinsonism | Exclusion criteria (secondary Parkinsonism) |
| Read codes (version 2) | F123. | Postencephalitic parkinsonism | Exclusion criteria (secondary Parkinsonism) |
| Read codes (version 2) | F12W. | Secondary parkinsonism due to other external agents | Exclusion criteria (secondary Parkinsonism) |
| Read codes (version 2) | F12X. | Secondary parkinsonism, unspecified | Exclusion criteria (secondary Parkinsonism) |
| Read codes (version 2) | Fyu2200 | [X]Parkinsonism in disease classified elsewhere | Exclusion criteria (secondary Parkinsonism) |
| Read codes (version 2) | Fyu2900 | [X]Secondary parkinsonism, unspecified | Exclusion criteria (secondary Parkinsonism) |
| Read codes (version 2) | Fyu2100 | [X]Other secondary parkinsonism | Exclusion criteria (secondary Parkinsonism) |
| Read codes (version 2) | F122.00 | Malignant neuroleptic syndrome | Exclusion criteria (secondary Parkinsonism) |
| Read codes (version 2) | F1304 | Progressive supranuclear palsy | Exclusion criteria (Parkinson-plus syndrom) |
| Read codes (version 2) | F24y0 | Progressive supranuclear palsy | Exclusion criteria (Parkinson-plus syndrom) |
| Read codes (version 2) | F174. | Multiple system atrophy | Exclusion criteria (Parkinson-plus syndrom) |
| Read codes (version 2) | F1740 | Multpl sstm atrphy, cerblr var | Exclusion criteria (Parkinson-plus syndrom) |
| Read codes (version 2) | F1741 | Multpl sstm atroph, Parksn var | Exclusion criteria (Parkinson-plus syndrom) |
| Read codes (version 2) | F11y2 | Corticobasal degeneration | Exclusion criteria (Parkinson-plus syndrom) |
| Codes used to identify PwP with psychosis or/and on antipsychotics (applied after the initial extraction of PD cases in the first step. | | | |
| Read codes (version 2) | 1464 . | H/O: schizophrenia | Psychosis codes |
| Read codes (version 2) | E10.. | Schizophrenic disorders | Psychosis codes |
| Read codes (version 2) | E100. | Simple schizophrenia | Psychosis codes |
| Read codes (version 2) | E1000 | Unspecified schizophrenia | Psychosis codes |
| Read codes (version 2) | E1001 | Subchronic schizophrenia | Psychosis codes |
| Read codes (version 2) | E1002 | Chronic schizophrenic | Psychosis codes |
| Read codes (version 2) | E1003 | Acute exacerbation of subchronic schizophrenia | Psychosis codes |
| Read codes (version 2) | E1004 | Acute exacerbation of chronic schizophrenia | Psychosis codes |
| Read codes (version 2) | E1005 | Schizophrenia in remission | Psychosis codes |
| Read codes (version 2) | E100z | Simple schizophrenia NOS | Psychosis codes |
| Read codes (version 2) | E101. | Hebephrenic schizophrenia | Psychosis codes |
| Read codes (version 2) | E1010 | Unspecified hebephrenic schizophrenia | Psychosis codes |
| Read codes (version 2) | E1011 | Subchronic hebephrenic schizophrenia | Psychosis codes |
| Read codes (version 2) | E1012 | Chronic hebephrenic schizophrenia | Psychosis codes |
| Read codes (version 2) | E1013 | Acute exacerbation of subchronic hebephrenic schizophrenia | Psychosis codes |
| Read codes (version 2) | E1014 | Acute exacerbation of chronic hebephrenic schizophrenia | Psychosis codes |
| Read codes (version 2) | E1015 | Hebephrenic schizophrenia in remission | Psychosis codes |
| Read codes (version 2) | E101z | Hebephrenic schizophrenia NOS | Psychosis codes |
| Read codes (version 2) | E102. | Catatonic schizophrenia | Psychosis codes |
| Read codes (version 2) | E1020 | Unspecified catatonic schizophrenia | Psychosis codes |
| Read codes (version 2) | E1021 | Subchronic catatonic schizophrenia | Psychosis codes |
| Read codes (version 2) | E1022 | Chronic catatonic schizophrenia | Psychosis codes |
| Read codes (version 2) | E1023 | Acute exacerbation of subchronic catatonic schizophrenia | Psychosis codes |
| Read codes (version 2) | E1024 | Acute exacerbation of chronic catatonic schizophrenia | Psychosis codes |
| Read codes (version 2) | E1025 | Catatonic schizophrenia in remission | Psychosis codes |
| Read codes (version 2) | E102z | Catatonic schizophrenia NOS | Psychosis codes |
| Read codes (version 2) | E103. | Paranoid schizophrenia | Psychosis codes |
| Read codes (version 2) | E1030 | Unspecified paranoid schizophrenia | Psychosis codes |
| Read codes (version 2) | E1031 | Subchronic paranoid schizophrenia | Psychosis codes |
| Read codes (version 2) | E1032 | Chronic paranoid schizophrenia | Psychosis codes |
| Read codes (version 2) | E1033 | Acute exacerbation of subchronic paranoid schizophrenia | Psychosis codes |
| Read codes (version 2) | E1034 | Acute exacerbation of chronic paranoid schizophrenia | Psychosis codes |
| Read codes (version 2) | E1035 | Paranoid schizophrenia in remission | Psychosis codes |
| Read codes (version 2) | E103z | Paranoid schizophrenia NOS | Psychosis codes |
| Read codes (version 2) | E104. | Acute schizophrenic episode | Psychosis codes |
| Read codes (version 2) | E105. | Latent schizophrenia | Psychosis codes |
| Read codes (version 2) | E1050 | Unspecified latent schizophrenia | Psychosis codes |
| Read codes (version 2) | E1051 | Subchronic latent schizophrenia | Psychosis codes |
| Read codes (version 2) | E1052 | Chronic latent schizophrenia | Psychosis codes |
| Read codes (version 2) | E1053 | Acute exacerbation of subchronic latent schizophrenia | Psychosis codes |
| Read codes (version 2) | E1054 | Acute exacerbation of chronic latent schizophrenia | Psychosis codes |
| Read codes (version 2) | E1055 | Latent schizophrenia in remission | Psychosis codes |
| Read codes (version 2) | E105z | Latent schizophrenia NOS | Psychosis codes |
| Read codes (version 2) | E106. | Residual schizophrenia | Psychosis codes |
| Read codes (version 2) | E107. | Schizo-affective schizophrenia | Psychosis codes |
| Read codes (version 2) | E1070 | Unspecified schizo-affective schizophrenia | Psychosis codes |
| Read codes (version 2) | E1071 | Subchronic schizo-affective schizophrenia | Psychosis codes |
| Read codes (version 2) | E1072 | Chronic schizo-affective schizophrenia | Psychosis codes |
| Read codes (version 2) | E1073 | Acute exacerbation of subchronic schizo-affective schizophrenia | Psychosis codes |
| Read codes (version 2) | E1074 | Acute exacerbation of chronic schizo-affective schizophrenia | Psychosis codes |
| Read codes (version 2) | E1075 | Schizo-affective schizophrenia in remission | Psychosis codes |
| Read codes (version 2) | E107z | Schizo-affective schizophrenia NOS | Psychosis codes |
| Read codes (version 2) | E10y. | Other schizophrenia | Psychosis codes |
| Read codes (version 2) | E10y0 | Atypical schizophrenia | Psychosis codes |
| Read codes (version 2) | E10y1 | Coenesthopathic schizophrenia | Psychosis codes |
| Read codes (version 2) | E10yz | other schizophrenia | Psychosis codes |
| Read codes (version 2) | E10z. | Schizophrenia NOS | Psychosis codes |
| Read codes (version 2) | ZV110 | [V]Personal history of schizophrenia | Psychosis codes |
| Read codes (version 2) | Eu2.. | [X]Schizophrenia, schizotypal and delusional disorders | Psychosis codes |
| Read codes (version 2) | Eu20. | [X]Schizophrenia | Psychosis codes |
| Read codes (version 2) | Eu200 | [X]Paranoid schizophrenia | Psychosis codes |
| Read codes (version 2) | Eu201 | [X]Hebephrenic schizophrenia | Psychosis codes |
| Read codes (version 2) | Eu202 | [X]Catatonic schizophrenia | Psychosis codes |
| Read codes (version 2) | Eu203 | [X]Undifferentiated schizophrenia | Psychosis codes |
| Read codes (version 2) | Eu204 | [X]Post-schizophrenic depression | Psychosis codes |
| Read codes (version 2) | Eu205 | [X]Residual schizophrenia | Psychosis codes |
| Read codes (version 2) | Eu206 | [X]Simple schizophrenia | Psychosis codes |
| Read codes (version 2) | Eu20y | [X]Other schizophrenia | Psychosis codes |
| Read codes (version 2) | Eu20z | [X]Schizophrenia, unspecified | Psychosis codes |
| Read codes (version 2) | Eu22. | [X]Persistent delusional disorders | Psychosis codes |
| Read codes (version 2) | Eu220 | [X]Delusional disorder | Psychosis codes |
| Read codes (version 2) | Eu221 | [X]Delusional misidentification syndrome | Psychosis codes |
| Read codes (version 2) | Eu222 | [X]Cotard syndrome | Psychosis codes |
| Read codes (version 2) | Eu22y | [X]Other persistent delusional disorders | Psychosis codes |
| Read codes (version 2) | Eu22z | [X]Persistent delusional disorder, unspecified | Psychosis codes |
| Read codes (version 2) | Eu25. | [X]Schizoaffective disorders | Psychosis codes |
| Read codes (version 2) | Eu250 | [X]Schizoaffective disorder, manic type | Psychosis codes |
| Read codes (version 2) | Eu251 | [X]Schizoaffective disorder, depressive type | Psychosis codes |
| Read codes (version 2) | Eu252 | [X]Schizoaffective disorder, mixed type | Psychosis codes |
| Read codes (version 2) | Eu25y | [X]Other schizoaffective disorders | Psychosis codes |
| Read codes (version 2) | Eu25z | [X]Schizoaffective disorder, unspecified | Psychosis codes |
| Read codes (version 2) | E11.. | Bipolar psychoses | Psychosis codes |
| Read codes (version 2) | E114. | Bipolar affective disorder, currently manic | Psychosis codes |
| Read codes (version 2) | E1140 | Bipolar affective disorder, currently manic, unspecified | Psychosis codes |
| Read codes (version 2) | E1141 | Bipolar affective disorder, currently manic, mild | Psychosis codes |
| Read codes (version 2) | E1142 | Bipolar affective disorder, currently manic, moderate | Psychosis codes |
| Read codes (version 2) | E1143 | Bipolar affective disorder, currently manic, severe, without mention of psychosis | Psychosis codes |
| Read codes (version 2) | E1144 | Bipolar affective disorder, currently manic, severe, with psychosis | Psychosis codes |
| Read codes (version 2) | E1145 | Bipolar affective disorder, currently manic, in partial or unspecified remission | Psychosis codes |
| Read codes (version 2) | E1146 | Bipolar affective disorder, currently manic, in full remission | Psychosis codes |
| Read codes (version 2) | E114z | Bipolar affective disorder, currently manic, NOS | Psychosis codes |
| Read codes (version 2) | E115. | Bipolar affective disorder, currently depressed | Psychosis codes |
| Read codes (version 2) | E1150 | Bipolar affective disorder, currently depressed, unspecified | Psychosis codes |
| Read codes (version 2) | E1151 | Bipolar affective disorder, currently depressed, mild | Psychosis codes |
| Read codes (version 2) | E1152 | Bipolar affective disorder, currently depressed, moderate | Psychosis codes |
| Read codes (version 2) | E1153 | Bipolar affective disorder, currently depressed, severe, without mention of psychosis | Psychosis codes |
| Read codes (version 2) | E1154 | Bipolar affective disorder, currently depressed, severe, with psychosis | Psychosis codes |
| Read codes (version 2) | E1155 | Bipolar affective disorder, currently depressed, in partial or unspecified remission | Psychosis codes |
| Read codes (version 2) | E1156 | Bipolar affective disorder, currently depressed, in full remission | Psychosis codes |
| Read codes (version 2) | E115z | Bipolar affective disorder, currently depressed, NOS | Psychosis codes |
| Read codes (version 2) | E116. | Mixed bipolar affective disorder | Psychosis codes |
| Read codes (version 2) | E1160 | Mixed bipolar affective disorder, unspecified | Psychosis codes |
| Read codes (version 2) | E1161 | Mixed bipolar affective disorder, mild | Psychosis codes |
| Read codes (version 2) | E1162 | Mixed bipolar affective disorder, moderate | Psychosis codes |
| Read codes (version 2) | E1163 | Mixed bipolar affective disorder, severe, without mention of psychosis | Psychosis codes |
| Read codes (version 2) | E1164 | Mixed bipolar affective disorder, severe, with psychosis | Psychosis codes |
| Read codes (version 2) | E1165 | Mixed bipolar affective disorder, in partial or unspecified remission | Psychosis codes |
| Read codes (version 2) | E1166 | Mixed bipolar affective disorder, in full remission | Psychosis codes |
| Read codes (version 2) | E116z | Mixed bipolar affective disorder, NOS | Psychosis codes |
| Read codes (version 2) | E117. | Unspecified bipolar affective disorder | Psychosis codes |
| Read codes (version 2) | E1170 | Unspecified bipolar affective disorder, unspecified | Psychosis codes |
| Read codes (version 2) | E1171 | Unspecified bipolar affective disorder, mild | Psychosis codes |
| Read codes (version 2) | E1172 | Unspecified bipolar affective disorder, moderate | Psychosis codes |
| Read codes (version 2) | E1173 | Unspecified bipolar affective disorder, severe, without mention of psychosis | Psychosis codes |
| Read codes (version 2) | E1174 | Unspecified bipolar affective disorder, severe, with psychosis | Psychosis codes |
| Read codes (version 2) | E1175 | Unspecified bipolar affective disorder, in partial or unspecified remission | Psychosis codes |
| Read codes (version 2) | E1176 | Unspecified bipolar affective disorder, in full remission | Psychosis codes |
| Read codes (version 2) | E117z | Unspecified bipolar affective disorder, NOS | Psychosis codes |
| Read codes (version 2) | E11y. | Other and unspecified manic-depressive psychoses | Psychosis codes |
| Read codes (version 2) | E11y0 | Unspecified manic-depressive psychoses | Psychosis codes |
| Read codes (version 2) | E11y1 | Atypical manic disorder | Psychosis codes |
| Read codes (version 2) | E11y3 | Other mixed manic-depressive psychoses | Psychosis codes |
| Read codes (version 2) | E11yz | Other and unspecified manic-depressive psychoses NOS | Psychosis codes |
| Read codes (version 2) | Eu31. | [X]Bipolar affective disorder | Psychosis codes |
| Read codes (version 2) | Eu310 | [X]Bipolar affective disorder, current episode hypomanic | Psychosis codes |
| Read codes (version 2) | Eu311 | [X]Bipolar affective disorder, current episode manic without psychotic symptoms | Psychosis codes |
| Read codes (version 2) | Eu312 | [X]Bipolar affective disorder, current episode manic with psychotic symptoms | Psychosis codes |
| Read codes (version 2) | Eu313 | [X]Bipolar affective disorder, current episode mild or moderate depression | Psychosis codes |
| Read codes (version 2) | Eu314 | [X]Bipolar affective disorder, current episode severe depression without psychotic symptoms | Psychosis codes |
| Read codes (version 2) | Eu315 | [X]Bipolar affective disorder, current episode severe depression with psychotic symptoms | Psychosis codes |
| Read codes (version 2) | Eu316 | [X]Bipolar affective disorder, current episode mixed | Psychosis codes |
| Read codes (version 2) | Eu317 | [X]Bipolar affective disorder, currently in remission | Psychosis codes |
| Read codes (version 2) | Eu31y | [X]Other bipolar affective disorders | Psychosis codes |
| Read codes (version 2) | Eu31z | [X]Bipolar affective disorder, unspecified | Psychosis codes |
| Read codes (version 2) | 212V. | Bipolar affective disorder resolved | Psychosis codes |
| Read codes (version 2) | Eu30. | [X]Bipolar disorder, single manic episode | Psychosis codes |
| Read codes (version 2) | Eu300 | [X]Hypomania | Psychosis codes |
| Read codes (version 2) | Eu301 | [X]Mania without psychotic symptoms | Psychosis codes |
| Read codes (version 2) | Eu302 | [X]Mania with psychotic symptoms | Psychosis codes |
| Read codes (version 2) | Eu30y | [X]Other manic episodes | Psychosis codes |
| Read codes (version 2) | Eu30z | [X]Manic episode, unspecified | Psychosis codes |
| Read codes (version 2) | 212T. | Psychosis, schizophrenia and bipolar affective disorder resolved | Psychosis codes |
| Read codes (version 2) | d4… | All antipsychotic drugs | Antipsychotic drugs |
| Read codes (version 2) | d4f.. | SULPIRIDE | Antipsychotic drugs (Sulpiride) |
| Read codes (version 2) | d4f1. | DOLMATIL 200mg tablets | Antipsychotic drugs (Sulpiride) |
| Read codes (version 2) | d4f2. | *SULPITIL 200mg tablets x28CP | Antipsychotic drugs (Sulpiride) |
| Read codes (version 2) | d4f3. | *SULPITIL 200mg tablets x112CP | Antipsychotic drugs (Sulpiride) |
| Read codes (version 2) | d4f4. | *SULPAREX 200mg tablets | Antipsychotic drugs (Sulpiride) |
| Read codes (version 2) | d4f5. | DOLMATIL 400mg tablets | Antipsychotic drugs (Sulpiride) |
| Read codes (version 2) | d4f6. | SULPOR 200mg/5mL oral solution | Antipsychotic drugs (Sulpiride) |
| Read codes (version 2) | d4fw. | SULPIRIDE 200mg/5mL oral solution | Antipsychotic drugs (Sulpiride) |
| Read codes (version 2) | d4fx. | SULPIRIDE 400mg tablets | Antipsychotic drugs (Sulpiride) |
| Read codes (version 2) | d4fy. | SULPIRIDE 200mg/5mL sugar free solution | Antipsychotic drugs (Sulpiride) |
| Read codes (version 2) | d4fz. | SULPIRIDE 200mg tablets | Antipsychotic drugs (Sulpiride) |
| Read codes (version 2) | d41.. | CHLORPROMAZINE HYDROCHLORIDE | Typical antipsychotic drugs |
| Read codes (version 2) | d411. | CHLORPROMAZINE 10mg tablets | Typical antipsychotic drugs |
| Read codes (version 2) | d412. | CHLORPROMAZINE 25mg tablets | Typical antipsychotic drugs |
| Read codes (version 2) | d413. | CHLORPROMAZINE 50mg tablets | Typical antipsychotic drugs |
| Read codes (version 2) | d414. | CHLORPROMAZINE 100mg tablets | Typical antipsychotic drugs |
| Read codes (version 2) | d415. | CHLORPROMAZINE 25mg/5mL syrup | Typical antipsychotic drugs |
| Read codes (version 2) | d416. | CHLORACTIL 25mg tablets | Typical antipsychotic drugs |
| Read codes (version 2) | d417. | CHLORACTIL 50mg tablets | Typical antipsychotic drugs |
| Read codes (version 2) | d418. | CHLORACTIL 100mg tablets | Typical antipsychotic drugs |
| Read codes (version 2) | d419. | *DOZINE 25mg/5mL syrup | Typical antipsychotic drugs |
| Read codes (version 2) | d41A. | CHLORPROMAZINE 25mg/5mL sugar free solution | Typical antipsychotic drugs |
| Read codes (version 2) | d41B. | CHLORPROMAZINE 100mg/5mL sugar free solution | Typical antipsychotic drugs |
| Read codes (version 2) | d41a. | *LARGACTIL 10mg tablets | Typical antipsychotic drugs |
| Read codes (version 2) | d41b. | *LARGACTIL 25mg tablets | Typical antipsychotic drugs |
| Read codes (version 2) | d41c. | *LARGACTIL 50mg tablets | Typical antipsychotic drugs |
| Read codes (version 2) | d41d. | *LARGACTIL 100mg tablets | Typical antipsychotic drugs |
| Read codes (version 2) | d41e. | *LARGACTIL 25mg/5mL syrup | Typical antipsychotic drugs |
| Read codes (version 2) | d41f. | LARGACTIL FORTE 100mg/5mL syrup | Typical antipsychotic drugs |
| Read codes (version 2) | d41g. | *LARGACTIL 25mg/mL injection | Typical antipsychotic drugs |
| Read codes (version 2) | d41h. | LARGACTIL [CNS] 50mg/2mL injection | Typical antipsychotic drugs |
| Read codes (version 2) | d41i. | *LARGACTIL 100mg suppositories | Typical antipsychotic drugs |
| Read codes (version 2) | d41j. | CHLORPROMAZINE 100mg/5mL sugar free suspension | Typical antipsychotic drugs |
| Read codes (version 2) | d41k. | CHLORPROMAZINE 100mg suppositories | Typical antipsychotic drugs |
| Read codes (version 2) | d41l. | CHLORPROMAZINE 25mg/1mL injection | Typical antipsychotic drugs |
| Read codes (version 2) | d41m. | CHLORPROMAZINE 50mg/2mL injection | Typical antipsychotic drugs |
| Read codes (version 2) | d41o. | CHLORPROMAZINE 100mg/5mL syrup | Typical antipsychotic drugs |
| Read codes (version 2) | d42.. | BENPERIDOL | Typical antipsychotic drugs |
| Read codes (version 2) | d421. | ANQUIL 250micrograms tablets | Typical antipsychotic drugs |
| Read codes (version 2) | d422. | *BENQUIL 250micrograms tablets | Typical antipsychotic drugs |
| Read codes (version 2) | d42z. | BENPERIDOL 250microgram tablets | Typical antipsychotic drugs |
| Read codes (version 2) | d43.. | *CHLORPROTHIXENE | Typical antipsychotic drugs |
| Read codes (version 2) | d431. | *TARACTAN 15mg tablets | Typical antipsychotic drugs |
| Read codes (version 2) | d432. | *TARACTAN 50mg tablets | Typical antipsychotic drugs |
| Read codes (version 2) | d43y. | *CHLORPROTHIXENE 15mg tablets | Typical antipsychotic drugs |
| Read codes (version 2) | d43z. | *CHLORPROTHIXENE 50mg tablets | Typical antipsychotic drugs |
| Read codes (version 2) | d44.. | DROPERIDOL [CENTRAL NERVOUS SYSTEM USE] | Typical antipsychotic drugs |
| Read codes (version 2) | d441. | *DROLEPTAN 10mg tablets | Typical antipsychotic drugs |
| Read codes (version 2) | d442. | *DROLEPTAN 1mg/mL oral liquid | Typical antipsychotic drugs |
| Read codes (version 2) | d443. | *DROLEPTAN 10mg/2mL injection | Typical antipsychotic drugs |
| Read codes (version 2) | d444. | XOMOLIX 2.5mg/1mL solution for injection | Typical antipsychotic drugs |
| Read codes (version 2) | d44w. | DROPERIDOL 2.5mg/1mL solution for injection | Typical antipsychotic drugs |
| Read codes (version 2) | d44x. | *DROPERIDOL 10mg tablets | Typical antipsychotic drugs |
| Read codes (version 2) | d44y. | *DROPERIDOL 1mg/mL oral liquid | Typical antipsychotic drugs |
| Read codes (version 2) | d44z. | *DROPERIDOL 10mg/2mL injection | Typical antipsychotic drugs |
| Read codes (version 2) | d45.. | FLUPENTIXOL [ANTIPSYCHOTIC] | Typical antipsychotic drugs |
| Read codes (version 2) | d451. | DEPIXOL 3mg tablets | Typical antipsychotic drugs |
| Read codes (version 2) | d45z. | FLUPENTIXOL 3mg tablets | Typical antipsychotic drugs |
| Read codes (version 2) | d46.. | FLUPHENAZINE HYDROCHLORIDE | Typical antipsychotic drugs |
| Read codes (version 2) | d461. | *MODITEN 1mg tablets | Typical antipsychotic drugs |
| Read codes (version 2) | d462. | *MODITEN 2.5mg tablets | Typical antipsychotic drugs |
| Read codes (version 2) | d463. | *MODITEN 5mg tablets | Typical antipsychotic drugs |
| Read codes (version 2) | d46x. | FLUPHENAZINE HYDROCHLORIDE 1mg tablets | Typical antipsychotic drugs |
| Read codes (version 2) | d46y. | FLUPHENAZINE HYDROCHLORIDE 2.5mg tablets | Typical antipsychotic drugs |
| Read codes (version 2) | d46z. | FLUPHENAZINE HYDROCHLORIDE 5mg tablets | Typical antipsychotic drugs |
| Read codes (version 2) | d47.. | HALOPERIDOL [ANTIPSYCHOTIC] | Typical antipsychotic drugs |
| Read codes (version 2) | d471. | HALOPERIDOL 1.5mg tablets | Typical antipsychotic drugs |
| Read codes (version 2) | d472. | HALOPERIDOL 5mg tablets | Typical antipsychotic drugs |
| Read codes (version 2) | d473. | HALOPERIDOL 10mg tablets | Typical antipsychotic drugs |
| Read codes (version 2) | d474. | HALOPERIDOL 20mg tablets | Typical antipsychotic drugs |
| Read codes (version 2) | d475. | HALOPERIDOL 2mg/mL liquid | Typical antipsychotic drugs |
| Read codes (version 2) | d476. | DOZIC 1mg/mL liquid | Typical antipsychotic drugs |
| Read codes (version 2) | d477. | *DOZIC 2mg/mL liquid | Typical antipsychotic drugs |
| Read codes (version 2) | d478. | FORTUNAN 500micrograms tablets | Typical antipsychotic drugs |
| Read codes (version 2) | d479. | *FORTUNAN 1.5mg tablets | Typical antipsychotic drugs |
| Read codes (version 2) | d47A. | HALOPERIDOL 2mg/5mL sugar free solution | Typical antipsychotic drugs |
| Read codes (version 2) | d47B. | HALOPERIDOL 1mg/5mL sugar free solution | Typical antipsychotic drugs |
| Read codes (version 2) | d47C. | KENTACE 1.5mg tablets | Typical antipsychotic drugs |
| Read codes (version 2) | d47D. | KENTACE 5mg tablets | Typical antipsychotic drugs |
| Read codes (version 2) | d47E. | KENTACE 10mg tablets | Typical antipsychotic drugs |
| Read codes (version 2) | d47F. | KENTACE 20mg tablets | Typical antipsychotic drugs |
| Read codes (version 2) | d47a. | *FORTUNAN 5mg tablets | Typical antipsychotic drugs |
| Read codes (version 2) | d47b. | *FORTUNAN 10mg tablets | Typical antipsychotic drugs |
| Read codes (version 2) | d47c. | *FORTUNAN 20mg tablets | Typical antipsychotic drugs |
| Read codes (version 2) | d47d. | HALDOL 5mg tablets | Typical antipsychotic drugs |
| Read codes (version 2) | d47e. | HALDOL 10mg tablets | Typical antipsychotic drugs |
| Read codes (version 2) | d47f. | HALDOL 2mg/mL liquid | Typical antipsychotic drugs |
| Read codes (version 2) | d47g. | *HALDOL 10mg/mL liquid | Typical antipsychotic drugs |
| Read codes (version 2) | d47h. | HALDOL 5mg/1mL injection | Typical antipsychotic drugs |
| Read codes (version 2) | d47i. | *HALDOL 10mg/2mL injection | Typical antipsychotic drugs |
| Read codes (version 2) | d47j. | SERENACE 500micrograms capsules | Typical antipsychotic drugs |
| Read codes (version 2) | d47k. | SERENACE 1.5mg tablets | Typical antipsychotic drugs |
| Read codes (version 2) | d47l. | SERENACE 5mg tablets | Typical antipsychotic drugs |
| Read codes (version 2) | d47m. | SERENACE 10mg tablets | Typical antipsychotic drugs |
| Read codes (version 2) | d47n. | SERENACE 20mg tablets | Typical antipsychotic drugs |
| Read codes (version 2) | d47o. | SERENACE 2mg/mL liquid 100mL | Typical antipsychotic drugs |
| Read codes (version 2) | d47p. | SERENACE 5mg/1mL injection | Typical antipsychotic drugs |
| Read codes (version 2) | d47q. | SERENACE 20mg/2mL injection | Typical antipsychotic drugs |
| Read codes (version 2) | d47r. | HALOPERIDOL 500microgram capsules | Typical antipsychotic drugs |
| Read codes (version 2) | d47s. | SERENACE 2mg/mL liquid 500mL | Typical antipsychotic drugs |
| Read codes (version 2) | d47t. | HALOPERIDOL 1mg/mL liquid | Typical antipsychotic drugs |
| Read codes (version 2) | d47u. | HALOPERIDOL 500micrograms tablets | Typical antipsychotic drugs |
| Read codes (version 2) | d47v. | HALOPERIDOL 5mg/1mL injection | Typical antipsychotic drugs |
| Read codes (version 2) | d47w. | HALOPERIDOL 10mg/2mL injection | Typical antipsychotic drugs |
| Read codes (version 2) | d47x. | HALOPERIDOL 20mg/2mL injection | Typical antipsychotic drugs |
| Read codes (version 2) | d47y. | HALOPERIDOL 10mg/mL oral solution | Typical antipsychotic drugs |
| Read codes (version 2) | d48.. | LEVOMEPROMAZINE | Typical antipsychotic drugs |
| Read codes (version 2) | d481. | NOZINAN 25mg/1mL injection | Typical antipsychotic drugs |
| Read codes (version 2) | d482. | *VERACTIL 25mg tablets | Typical antipsychotic drugs |
| Read codes (version 2) | d483. | NOZINAN 25mg tablets | Typical antipsychotic drugs |
| Read codes (version 2) | d48y. | LEVOMEPROMAZINE 25mg/1mL injection | Typical antipsychotic drugs |
| Read codes (version 2) | d48z. | LEVOMEPROMAZINE 25mg tablets | Typical antipsychotic drugs |
| Read codes (version 2) | d49.. | OXYPERTINE | Typical antipsychotic drugs |
| Read codes (version 2) | d491. | *INTEGRIN 10mg capsules | Typical antipsychotic drugs |
| Read codes (version 2) | d492. | *INTEGRIN 40mg tablets | Typical antipsychotic drugs |
| Read codes (version 2) | d49y. | *OXYPERTINE 10mg capsules | Typical antipsychotic drugs |
| Read codes (version 2) | d49z. | *OXYPERTINE 40mg tablets | Typical antipsychotic drugs |
| Read codes (version 2) | d4a.. | PERICYAZINE | Typical antipsychotic drugs |
| Read codes (version 2) | d4a1. | *NEULACTIL 2.5mg tablets | Typical antipsychotic drugs |
| Read codes (version 2) | d4a2. | *NEULACTIL 10mg tablets | Typical antipsychotic drugs |
| Read codes (version 2) | d4a3. | *NEULACTIL 25mg tablets | Typical antipsychotic drugs |
| Read codes (version 2) | d4a4. | *NEULACTIL FORTE 10mg/5mL syrp | Typical antipsychotic drugs |
| Read codes (version 2) | d4aw. | PERICYAZINE 2.5mg tablets | Typical antipsychotic drugs |
| Read codes (version 2) | d4ax. | PERICYAZINE 10mg tablets | Typical antipsychotic drugs |
| Read codes (version 2) | d4ay. | *PERICYAZINE 25mg tablets | Typical antipsychotic drugs |
| Read codes (version 2) | d4az. | PERICYAZINE 10mg/5mL syrup | Typical antipsychotic drugs |
| Read codes (version 2) | d4b.. | PERPHENAZINE [CENTRAL NERVOUS SYSTEM USE] | Typical antipsychotic drugs |
| Read codes (version 2) | d4b1. | FENTAZIN 2mg tablets | Typical antipsychotic drugs |
| Read codes (version 2) | d4b2. | FENTAZIN 4mg tablets | Typical antipsychotic drugs |
| Read codes (version 2) | d4b3. | *FENTAZIN 8mg tablets | Typical antipsychotic drugs |
| Read codes (version 2) | d4b4. | *FENTAZIN 5mg/1mL injection | Typical antipsychotic drugs |
| Read codes (version 2) | d4b5. | PERPHENAZINE 2mg/5mL sugar free solution | Typical antipsychotic drugs |
| Read codes (version 2) | d4b6. | PERPHENAZINE 4mg/5mL sugar free solution | Typical antipsychotic drugs |
| Read codes (version 2) | d4bx. | PERPHENAZINE 2mg tablets | Typical antipsychotic drugs |
| Read codes (version 2) | d4by. | PERPHENAZINE 4mg tablets | Typical antipsychotic drugs |
| Read codes (version 2) | d4bz. | *PERPHENAZINE 8mg tablets | Typical antipsychotic drugs |
| Read codes (version 2) | d4c.. | PIMOZIDE | Typical antipsychotic drugs |
| Read codes (version 2) | d4c1. | *ORAP 2mg tablets | Typical antipsychotic drugs |
| Read codes (version 2) | d4c2. | ORAP 4mg tablets | Typical antipsychotic drugs |
| Read codes (version 2) | d4c3. | *ORAP 10mg tablets | Typical antipsychotic drugs |
| Read codes (version 2) | d4cx. | *PIMOZIDE 2mg tablets | Typical antipsychotic drugs |
| Read codes (version 2) | d4cy. | PIMOZIDE 4mg tablets | Typical antipsychotic drugs |
| Read codes (version 2) | d4cz. | *PIMOZIDE 10mg tablets | Typical antipsychotic drugs |
| Read codes (version 2) | d4d.. | PROCHLORPERAZINE [antipsych] [see dhe..] | Typical antipsychotic drugs |
| Read codes (version 2) | d4e.. | PROMAZINE HYDROCHLORIDE | Typical antipsychotic drugs |
| Read codes (version 2) | d4e1. | *SPARINE 50mg/5mL suspension | Typical antipsychotic drugs |
| Read codes (version 2) | d4e2. | *SPARINE 50mg/1mL injection | Typical antipsychotic drugs |
| Read codes (version 2) | d4e3. | *SPARINE 100mg/2mL injection | Typical antipsychotic drugs |
| Read codes (version 2) | d4e4. | PROMAZINE 25mg tablets | Typical antipsychotic drugs |
| Read codes (version 2) | d4e5. | PROMAZINE 50mg tablets | Typical antipsychotic drugs |
| Read codes (version 2) | d4ev. | PROMAZINE 25mg/5mL syrup | Typical antipsychotic drugs |
| Read codes (version 2) | d4ew. | PROMAZINE 50mg/5mL syrup | Typical antipsychotic drugs |
| Read codes (version 2) | d4ex. | *PROMAZINE 50mg/5mL suspension | Typical antipsychotic drugs |
| Read codes (version 2) | d4ey. | PROMAZINE 50mg/1mL injection | Typical antipsychotic drugs |
| Read codes (version 2) | d4ez. | *PROMAZINE 100mg/2mL injection | Typical antipsychotic drugs |
| Read codes (version 2) | d4g.. | THIORIDAZINE | Typical antipsychotic drugs |
| Read codes (version 2) | d4g1. | *MELLERIL 10mg tablets | Typical antipsychotic drugs |
| Read codes (version 2) | d4g2. | *MELLERIL 25mg tablets | Typical antipsychotic drugs |
| Read codes (version 2) | d4g3. | *MELLERIL 50mg tablets | Typical antipsychotic drugs |
| Read codes (version 2) | d4g4. | *MELLERIL 100mg tablets | Typical antipsychotic drugs |
| Read codes (version 2) | d4g5. | *MELLERIL 25mg/5mL suspension | Typical antipsychotic drugs |
| Read codes (version 2) | d4g6. | MELLERIL 100mg/5mL oral suspension | Typical antipsychotic drugs |
| Read codes (version 2) | d4g7. | MELLERIL 25mg/5mL orange syrup | Typical antipsychotic drugs |
| Read codes (version 2) | d4gp. | THIORIDAZINE 10mg/5mL syrup | Typical antipsychotic drugs |
| Read codes (version 2) | d4gq. | THIORIDAZINE 25mg/5mL sugar free solution | Typical antipsychotic drugs |
| Read codes (version 2) | d4gr. | THIORIDAZINE 50mg/5mL sugar free solution | Typical antipsychotic drugs |
| Read codes (version 2) | d4gs. | THIORIDAZINE 100mg/5mL sugar free solution | Typical antipsychotic drugs |
| Read codes (version 2) | d4gt. | *THIORIDAZINE 10mg tablets | Typical antipsychotic drugs |
| Read codes (version 2) | d4gu. | THIORIDAZINE 25mg tablets | Typical antipsychotic drugs |
| Read codes (version 2) | d4gv. | THIORIDAZINE 50mg tablets | Typical antipsychotic drugs |
| Read codes (version 2) | d4gw. | THIORIDAZINE 100mg tablets | Typical antipsychotic drugs |
| Read codes (version 2) | d4gx. | THIORIDAZINE 25mg/5mL suspension | Typical antipsychotic drugs |
| Read codes (version 2) | d4gy. | THIORIDAZINE 100mg/5mL oral suspension | Typical antipsychotic drugs |
| Read codes (version 2) | d4gz. | *THIORIDAZINE 25mg/5mL syrup | Typical antipsychotic drugs |
| Read codes (version 2) | d4h.. | TRIFLUOPERAZINE [ANTIPSYCHOTIC] | Typical antipsychotic drugs |
| Read codes (version 2) | d4h1. | STELAZINE 1mg tablets | Typical antipsychotic drugs |
| Read codes (version 2) | d4h2. | STELAZINE 5mg tablets | Typical antipsychotic drugs |
| Read codes (version 2) | d4h3. | *STELAZINE 2mg m/r capsules | Typical antipsychotic drugs |
| Read codes (version 2) | d4h4. | *STELAZINE 10mg m/r capsules | Typical antipsychotic drugs |
| Read codes (version 2) | d4h5. | *STELAZINE 15mg m/r capsules | Typical antipsychotic drugs |
| Read codes (version 2) | d4h6. | STELAZINE 1mg/5mL syrup | Typical antipsychotic drugs |
| Read codes (version 2) | d4h7. | STELAZINE CONCENTRATE 10mg/mL liquid | Typical antipsychotic drugs |
| Read codes (version 2) | d4h8. | *STELAZINE 1mg/1mL injection | Typical antipsychotic drugs |
| Read codes (version 2) | d4h9. | TRIFLUOPERAZINE 5mg/5mL sugar free syrup | Typical antipsychotic drugs |
| Read codes (version 2) | d4hA. | STELAZINE FORTE 5mg/5mL sugar free oral suspension | Typical antipsychotic drugs |
| Read codes (version 2) | d4hr. | TRIFLUOPERAZINE 5mg/5mL sugar free oral suspension | Typical antipsychotic drugs |
| Read codes (version 2) | d4hs. | TRIFLUOPERAZINE 1mg tablets | Typical antipsychotic drugs |
| Read codes (version 2) | d4ht. | TRIFLUOPERAZINE 5mg tablets | Typical antipsychotic drugs |
| Read codes (version 2) | d4hu. | *TRIFLUOPERAZINE 2mg m/r caps | Typical antipsychotic drugs |
| Read codes (version 2) | d4hv. | *TRIFLUOPERAZINE 10mg m/r caps | Typical antipsychotic drugs |
| Read codes (version 2) | d4hw. | *TRIFLUOPERAZINE 15mg m/r caps | Typical antipsychotic drugs |
| Read codes (version 2) | d4hx. | TRIFLUOPERAZINE 1mg/5mL syrup | Typical antipsychotic drugs |
| Read codes (version 2) | d4hy. | TRIFLUOPERAZINE 10mg/mL liquid | Typical antipsychotic drugs |
| Read codes (version 2) | d4hz. | TRIFLUOPERAZINE 1mg/1mL injection | Typical antipsychotic drugs |
| Read codes (version 2) | d4i1. | TRIFLUPERIDOL | Typical antipsychotic drugs |
| Read codes (version 2) | d4i2. | TRIPERIDOL 500micrograms tablets | Typical antipsychotic drugs |
| Read codes (version 2) | d4iy. | *TRIPERIDOL 1mg tablets | Typical antipsychotic drugs |
| Read codes (version 2) | d4iz. | TRIFLUPERIDOL 500microgram tablets | Typical antipsychotic drugs |
| Read codes (version 2) | d4l.. | *TRIFLUPERIDOL 1mg tablets | Typical antipsychotic drugs |
| Read codes (version 2) | d4j.. | ZUCLOPENTHIXOL DIHYDROCHLORIDE | Typical antipsychotic drugs |
| Read codes (version 2) | d4j1. | CLOPIXOL 2mg tablets | Typical antipsychotic drugs |
| Read codes (version 2) | d4j2. | CLOPIXOL 10mg tablets | Typical antipsychotic drugs |
| Read codes (version 2) | d4j3. | CLOPIXOL 25mg tablets | Typical antipsychotic drugs |
| Read codes (version 2) | d4jx. | ZUCLOPENTHIXOL DIHYDROCHLORIDE 2mg tablets | Typical antipsychotic drugs |
| Read codes (version 2) | d4jy. | ZUCLOPENTHIXOL DIHYDROCHLORIDE 10mg tablets | Typical antipsychotic drugs |
| Read codes (version 2) | d4jz. | ZUCLOPENTHIXOL DIHYDROCHLORIDE 25mg tablets | Typical antipsychotic drugs |
| Read codes (version 2) | d4k.. | LOXAPINE SUCCINATE | Typical antipsychotic drugs |
| Read codes (version 2) | d4k1. | *LOXAPINE 10mg capsules | Typical antipsychotic drugs |
| Read codes (version 2) | d4k2. | *LOXAPINE 25mg capsules | Typical antipsychotic drugs |
| Read codes (version 2) | d4k3. | *LOXAPINE 50mg capsules | Typical antipsychotic drugs |
| Read codes (version 2) | d4k4. | *LOXAPAC 10mg capsules | Typical antipsychotic drugs |
| Read codes (version 2) | d4k5. | *LOXAPAC 25mg capsules | Typical antipsychotic drugs |
| Read codes (version 2) | d4k6. | *LOXAPAC 50mg capsules | Typical antipsychotic drugs |
| Read codes (version 2) | d4n.. | ZUCLOPENTHIXOL ACETATE | Typical antipsychotic drugs |
| Read codes (version 2) | d4n1. | CLOPIXOL ACUPHASE 50mg/1mL injection (oily) | Typical antipsychotic drugs |
| Read codes (version 2) | d4n2. | CLOPIXOL ACUPHASE 100mg/2mL injection (oily) | Typical antipsychotic drugs |
| Read codes (version 2) | d4n3. | ZUCLOPENTHIXOL ACETATE 50mg/1mL injection (oily) | Typical antipsychotic drugs |
| Read codes (version 2) | d4n4. | ZUCLOPENTHIXOL ACETATE 100mg/2mL injection (oily) | Typical antipsychotic drugs |
| Read codes (version 2) | d5... | ANTIPSYCHOTIC DEPOT INJECTIONS | Typical antipsychotic drugs |
| Read codes (version 2) | d51.. | FLUPENTIXOL DECANOATE | Typical antipsychotic drugs |
| Read codes (version 2) | d511. | DEPIXOL 20mg/1mL injection | Typical antipsychotic drugs |
| Read codes (version 2) | d512. | *DEPIXOL 20mg/1mL syringe | Typical antipsychotic drugs |
| Read codes (version 2) | d513. | DEPIXOL 40mg/2mL injection | Typical antipsychotic drugs |
| Read codes (version 2) | d514. | *DEPIXOL 40mg/2mL syringe | Typical antipsychotic drugs |
| Read codes (version 2) | d515. | *DEPIXOL 200mg/10mL injection | Typical antipsychotic drugs |
| Read codes (version 2) | d516. | DEPIXOL CONC. 100mg/1mL injection | Typical antipsychotic drugs |
| Read codes (version 2) | d517. | DEPIXOL CONC. 500mg/5mL injection | Typical antipsychotic drugs |
| Read codes (version 2) | d518. | DEPIXOL CONC. 50mg/0.5mL injection | Typical antipsychotic drugs |
| Read codes (version 2) | d519. | FLUPENTIXOL 50mg/0.5mL injection | Typical antipsychotic drugs |
| Read codes (version 2) | d51a. | DEPIXOL LOW VOLUME 200mg/1mL intramuscular injection | Typical antipsychotic drugs |
| Read codes (version 2) | d51s. | FLUPENTHIXOL DECANOATE 20mg/1mL prefilled syringe | Typical antipsychotic drugs |
| Read codes (version 2) | d51t. | FLUPENTHIXOL DECANOATE 40mg/2mL prefilled syringe | Typical antipsychotic drugs |
| Read codes (version 2) | d51u. | FLUPENTIXOL DECANOATE 200mg/1mL intramuscular injection | Typical antipsychotic drugs |
| Read codes (version 2) | d51v. | FLUPENTIXOL DECANOATE 20mg/1mL injection | Typical antipsychotic drugs |
| Read codes (version 2) | d51w. | FLUPENTIXOL DECANOATE 40mg/2mL injection | Typical antipsychotic drugs |
| Read codes (version 2) | d51x. | FLUPENTHIXOL DECANOATE 200mg/10mL injection | Typical antipsychotic drugs |
| Read codes (version 2) | d51y. | FLUPENTIXOL DECANOATE 100mg/1mL injection | Typical antipsychotic drugs |
| Read codes (version 2) | d51z. | FLUPENTHIXOL DECANOATE 500mg/5mL injection | Typical antipsychotic drugs |
| Read codes (version 2) | d52.. | FLUPHENAZINE DECANOATE | Typical antipsychotic drugs |
| Read codes (version 2) | d521. | MODECATE 12.5mg/0.5mL injection | Typical antipsychotic drugs |
| Read codes (version 2) | d522. | MODECATE 25mg/1mL injection | Typical antipsychotic drugs |
| Read codes (version 2) | d523. | *MODECATE 25mg/1mL syringe | Typical antipsychotic drugs |
| Read codes (version 2) | d524. | MODECATE 50mg/2mL injection | Typical antipsychotic drugs |
| Read codes (version 2) | d525. | *MODECATE 50mg/2mL syringe | Typical antipsychotic drugs |
| Read codes (version 2) | d526. | *MODECATE 250mg/10mL injection | Typical antipsychotic drugs |
| Read codes (version 2) | d527. | MODECATE CONCENTRATE 50mg/0.5mL injection | Typical antipsychotic drugs |
| Read codes (version 2) | d528. | MODECATE CONCENTRATE 100mg/1mL injection | Typical antipsychotic drugs |
| Read codes (version 2) | d529. | FLUPHENAZINE DECANOATE 50mg/0.5mL injection | Typical antipsychotic drugs |
| Read codes (version 2) | d52A. | *DECAZATE 25mg/1mL injection | Typical antipsychotic drugs |
| Read codes (version 2) | d52B. | *DECAZATE 50mg/0.5mL injection | Typical antipsychotic drugs |
| Read codes (version 2) | d52C. | *DECAZATE 100mg/1mL injection | Typical antipsychotic drugs |
| Read codes (version 2) | d52a. | FLUPHENAZINE DECANOATE 100mg/1mL injection | Typical antipsychotic drugs |
| Read codes (version 2) | d52s. | FLUPHENAZINE DECANOATE 25mg/1mL prefilled syringe | Typical antipsychotic drugs |
| Read codes (version 2) | d52t. | FLUPHENAZINE DECANOATE 50mg/2mL prefilled syringe | Typical antipsychotic drugs |
| Read codes (version 2) | d52u. | FLUPHENAZINE DECANOATE 12.5mg/0.5mL injection | Typical antipsychotic drugs |
| Read codes (version 2) | d52v. | FLUPHENAZINE DECANOATE 25mg/1mL injection | Typical antipsychotic drugs |
| Read codes (version 2) | d52w. | FLUPHENAZINE DECANOATE 50mg/2mL injection | Typical antipsychotic drugs |
| Read codes (version 2) | d52x. | FLUPHENAZINE DECANOATE 250mg/10mL injection | Typical antipsychotic drugs |
| Read codes (version 2) | d53.. | *FLUPHENAZINE ENANTHATE | Typical antipsychotic drugs |
| Read codes (version 2) | d531. | MODITEN ENANTHATE 25mg/1mL injection | Typical antipsychotic drugs |
| Read codes (version 2) | d532. | FLUPHENAZINE ENANTHATE 25mg/1mL injection | Typical antipsychotic drugs |
| Read codes (version 2) | d54.. | FLUSPIRILENE | Typical antipsychotic drugs |
| Read codes (version 2) | d541. | *REDEPTIN 2mg/1mL injection | Typical antipsychotic drugs |
| Read codes (version 2) | d542. | *REDEPTIN 6mg/3mL injection | Typical antipsychotic drugs |
| Read codes (version 2) | d543. | *REDEPTIN 12mg/6mL injection | Typical antipsychotic drugs |
| Read codes (version 2) | d544. | FLUSPIRILENE 2mg/1mL injection | Typical antipsychotic drugs |
| Read codes (version 2) | d545. | FLUSPIRILENE 6mg/3mL injection | Typical antipsychotic drugs |
| Read codes (version 2) | d546. | FLUSPIRILENE 12mg/6mL injection | Typical antipsychotic drugs |
| Read codes (version 2) | d55.. | HALOPERIDOL DECANOATE | Typical antipsychotic drugs |
| Read codes (version 2) | d551. | HALDOL DECANOATE 50mg/1mL injection | Typical antipsychotic drugs |
| Read codes (version 2) | d552. | HALDOL DECANOATE 100mg/1mL injection | Typical antipsychotic drugs |
| Read codes (version 2) | d553. | HALOPERIDOL 50mg/1mL injection | Typical antipsychotic drugs |
| Read codes (version 2) | d554. | HALOPERIDOL 100mg/1mL injection | Typical antipsychotic drugs |
| Read codes (version 2) | d56.. | PIPOTIAZINE PALMITATE | Typical antipsychotic drugs |
| Read codes (version 2) | d561. | PIPORTIL DEPOT 50mg/1mL injection | Typical antipsychotic drugs |
| Read codes (version 2) | d562. | PIPORTIL DEPOT 100mg/2mL injection | Typical antipsychotic drugs |
| Read codes (version 2) | d563. | PIPOTIAZINE 50mg/1mL injection | Typical antipsychotic drugs |
| Read codes (version 2) | d564. | PIPOTIAZINE 100mg/2mL injection | Typical antipsychotic drugs |
| Read codes (version 2) | d57.. | ZUCLOPENTHIXOL DECANOATE | Typical antipsychotic drugs |
| Read codes (version 2) | d571. | CLOPIXOL 200mg/1mL injection | Typical antipsychotic drugs |
| Read codes (version 2) | d572. | *CLOPIXOL 2g/10mL injection | Typical antipsychotic drugs |
| Read codes (version 2) | d573. | CLOPIXOL CONC. 500mg/1mL injection | Typical antipsychotic drugs |
| Read codes (version 2) | d574. | CLOPIXOL ACUPHASE 50mg/1mL injection (oily) | Typical antipsychotic drugs |
| Read codes (version 2) | d575. | CLOPIXOL ACUPHASE 100mg/2mL injection (oily) | Typical antipsychotic drugs |
| Read codes (version 2) | d576. | ZUCLOPENTHIXOL DECANOATE 200mg/1mL injection | Typical antipsychotic drugs |
| Read codes (version 2) | d577. | ZUCLOPENTHIXOL DECANOATE 50mg/1mL injection | Typical antipsychotic drugs |
| Read codes (version 2) | d578. | ZUCLOPENTHIXOL DECANOATE 100mg/2mL injection | Typical antipsychotic drugs |
| Read codes (version 2) | d57y. | ZUCLOPENTHIXOL DECANOATE 2g/10mL injection | Typical antipsychotic drugs |
| Read codes (version 2) | d57z. | ZUCLOPENTHIXOL DECANOATE 500mg/1mL injection | Typical antipsychotic drugs |
| Read codes (version 2) | d4l.. | CLOZAPINE | Atypical antipsychotic drugs |
| Read codes (version 2) | d4l1. | CLOZAPINE 25mg tablets | Atypical antipsychotic drugs |
| Read codes (version 2) | d4l2. | CLOZAPINE 100mg tablets | Atypical antipsychotic drugs |
| Read codes (version 2) | d4l3. | CLOZARIL 25mg tablets x84CP | Atypical antipsychotic drugs |
| Read codes (version 2) | d4l4. | CLOZARIL 100mg tablets x84CP | Atypical antipsychotic drugs |
| Read codes (version 2) | d4l5. | CLOZARIL COMMUNITY PACK 25mg tablets x28CP | Atypical antipsychotic drugs |
| Read codes (version 2) | d4l6. | CLOZARIL COMMUNITY PACK 100mg tablets x28CP | Atypical antipsychotic drugs |
| Read codes (version 2) | d4l7. | DENZAPINE 25mg tablets | Atypical antipsychotic drugs |
| Read codes (version 2) | d4l8. | DENZAPINE 100mg tablets | Atypical antipsychotic drugs |
| Read codes (version 2) | d4l9. | ZAPONEX 25mg tablets | Atypical antipsychotic drugs |
| Read codes (version 2) | d4lA. | ZAPONEX 100mg tablets | Atypical antipsychotic drugs |
| Read codes (version 2) | d4lB. | DENZAPINE 50mg/mL oral suspension 100mL | Atypical antipsychotic drugs |
| Read codes (version 2) | d4lC. | CLOZAPINE 50mg/mL oral suspension | Atypical antipsychotic drugs |
| Read codes (version 2) | d4lD. | DENZAPINE 50mg tablets | Atypical antipsychotic drugs |
| Read codes (version 2) | d4lE. | CLOZAPINE 50mg tablets | Atypical antipsychotic drugs |
| Read codes (version 2) | d4lF. | DENZAPINE 200mg tablets | Atypical antipsychotic drugs |
| Read codes (version 2) | d4lG. | CLOZAPINE 200mg tablets | Atypical antipsychotic drugs |
| Read codes (version 2) | d4m.. | REMOXIPRIDE | Atypical antipsychotic drugs |
| Read codes (version 2) | d4m1. | REMOXIPRIDE 150mg m/r capsules | Atypical antipsychotic drugs |
| Read codes (version 2) | d4m2. | REMOXIPRIDE 300mg m/r capsules | Atypical antipsychotic drugs |
| Read codes (version 2) | d4m3. | *ROXIAM 150mg m/r capsules | Atypical antipsychotic drugs |
| Read codes (version 2) | d4m4. | *ROXIAM 300mg m/r capsules | Atypical antipsychotic drugs |
| Read codes (version 2) | d4p.. | RISPERIDONE | Atypical antipsychotic drugs |
| Read codes (version 2) | d4p1. | RISPERIDONE 1mg tablets | Atypical antipsychotic drugs |
| Read codes (version 2) | d4p2. | RISPERIDONE 2mg tablets | Atypical antipsychotic drugs |
| Read codes (version 2) | d4p3. | RISPERIDONE 3mg tablets | Atypical antipsychotic drugs |
| Read codes (version 2) | d4p4. | RISPERIDONE 4mg tablets | Atypical antipsychotic drugs |
| Read codes (version 2) | d4p5. | RISPERDAL 1mg tablets | Atypical antipsychotic drugs |
| Read codes (version 2) | d4p6. | RISPERDAL 2mg tablets | Atypical antipsychotic drugs |
| Read codes (version 2) | d4p7. | RISPERDAL 3mg tablets | Atypical antipsychotic drugs |
| Read codes (version 2) | d4p8. | RISPERDAL 4mg tablets | Atypical antipsychotic drugs |
| Read codes (version 2) | d4p9. | RISPERIDONE 1mg/mL liquid | Atypical antipsychotic drugs |
| Read codes (version 2) | d4pA. | RISPERDAL 1mg/mL liquid | Atypical antipsychotic drugs |
| Read codes (version 2) | d4pB. | RISPERIDONE 6mg tablets | Atypical antipsychotic drugs |
| Read codes (version 2) | d4pC. | RISPERDAL 6mg tablets | Atypical antipsychotic drugs |
| Read codes (version 2) | d4pD. | RISPERDAL 0.5mg tablets | Atypical antipsychotic drugs |
| Read codes (version 2) | d4pE. | RISPERDAL CONSTA 25mg powder+solvent for suspension for injection | Atypical antipsychotic drugs |
| Read codes (version 2) | d4pF. | RISPERDAL CONSTA 37.5mg powder+solvent for suspension for injection | Atypical antipsychotic drugs |
| Read codes (version 2) | d4pG. | RISPERDAL CONSTA 50mg powder+solvent for suspension for injection | Atypical antipsychotic drugs |
| Read codes (version 2) | d4pH. | RISPERIDONE 1mg oro-dispersible tablets | Atypical antipsychotic drugs |
| Read codes (version 2) | d4pJ. | RISPERIDONE 2mg oro-dispersible tablets | Atypical antipsychotic drugs |
| Read codes (version 2) | d4pK. | RISPERDAL QUICKLET 1mg oro-dispersible tablets | Atypical antipsychotic drugs |
| Read codes (version 2) | d4pL. | RISPERDAL QUICKLET 2mg oro-dispersible tablets | Atypical antipsychotic drugs |
| Read codes (version 2) | d4pM. | RISPERIDONE 0.5mg oro-dispersible tablets | Atypical antipsychotic drugs |
| Read codes (version 2) | d4pN. | RISPERDAL QUICKLET 0.5mg oro-dispersible tablets | Atypical antipsychotic drugs |
| Read codes (version 2) | d4pO. | RISPERDAL QUICKLET 3mg oro-dispersible tablets | Atypical antipsychotic drugs |
| Read codes (version 2) | d4pP. | RISPERDAL QUICKLET 4mg oro-dispersible tablets | Atypical antipsychotic drugs |
| Read codes (version 2) | d4pQ. | RISPERIDONE 3mg oro-dispersible tablets | Atypical antipsychotic drugs |
| Read codes (version 2) | d4pR. | RISPERIDONE 4mg oro-dispersible tablets | Atypical antipsychotic drugs |
| Read codes (version 2) | d4pw. | RISPERIDONE 50mg powder+solvent for suspension for injection | Atypical antipsychotic drugs |
| Read codes (version 2) | d4px. | RISPERIDONE 37.5mg powder+solvent for suspension for injection | Atypical antipsychotic drugs |
| Read codes (version 2) | d4py. | RISPERIDONE 25mg powder+solvent for suspension for injection | Atypical antipsychotic drugs |
| Read codes (version 2) | d4pz. | RISPERIDONE 0.5mg tablets | Atypical antipsychotic drugs |
| Read codes (version 2) | d4q.. | SERTINDOLE | Atypical antipsychotic drugs |
| Read codes (version 2) | d4q1. | SERTINDOLE 4mg tablets | Atypical antipsychotic drugs |
| Read codes (version 2) | d4q2. | SERTINDOLE 12mg tablets | Atypical antipsychotic drugs |
| Read codes (version 2) | d4q3. | SERTINDOLE 16mg tablets | Atypical antipsychotic drugs |
| Read codes (version 2) | d4q4. | SERTINDOLE 20mg tablets | Atypical antipsychotic drugs |
| Read codes (version 2) | d4q5. | SERDOLECT 4mg tablets | Atypical antipsychotic drugs |
| Read codes (version 2) | d4q6. | SERDOLECT 12mg tablets | Atypical antipsychotic drugs |
| Read codes (version 2) | d4q7. | SERDOLECT 16mg tablets | Atypical antipsychotic drugs |
| Read codes (version 2) | d4q8. | SERDOLECT 20mg tablets | Atypical antipsychotic drugs |
| Read codes (version 2) | d4r.. | OLANZAPINE | Atypical antipsychotic drugs |
| Read codes (version 2) | d4r1. | OLANZAPINE 5mg tablets | Atypical antipsychotic drugs |
| Read codes (version 2) | d4r2. | OLANZAPINE 7.5mg tablets | Atypical antipsychotic drugs |
| Read codes (version 2) | d4r3. | OLANZAPINE 10mg tablets | Atypical antipsychotic drugs |
| Read codes (version 2) | d4r4. | ZYPREXA 5mg tablets | Atypical antipsychotic drugs |
| Read codes (version 2) | d4r5. | ZYPREXA 7.5mg tablets | Atypical antipsychotic drugs |
| Read codes (version 2) | d4r6. | ZYPREXA 10mg tablets | Atypical antipsychotic drugs |
| Read codes (version 2) | d4r7. | OLANZAPINE 2.5mg tablets | Atypical antipsychotic drugs |
| Read codes (version 2) | d4r8. | ZYPREXA 2.5mg tablets | Atypical antipsychotic drugs |
| Read codes (version 2) | d4r9. | ZYPREXA VELOTAB 5mg dispersible tablets | Atypical antipsychotic drugs |
| Read codes (version 2) | d4rA. | ZYPREXA VELOTAB 10mg dispersible tablets | Atypical antipsychotic drugs |
| Read codes (version 2) | d4rB. | ZYPREXA 15mg tablets | Atypical antipsychotic drugs |
| Read codes (version 2) | d4rC. | ZYPREXA VELOTAB 15mg dispersible tablets | Atypical antipsychotic drugs |
| Read codes (version 2) | d4rD. | ZYPREXA 10mg injection (pdr for recon) | Atypical antipsychotic drugs |
| Read codes (version 2) | d4rE. | ZYPREXA VELOTAB 20mg dispersible tablets | Atypical antipsychotic drugs |
| Read codes (version 2) | d4rF. | ZYPREXA 20mg tablets | Atypical antipsychotic drugs |
| Read codes (version 2) | d4rG. | ZALASTA 2.5mg tablets | Atypical antipsychotic drugs |
| Read codes (version 2) | d4rH. | ZALASTA 5mg tablets | Atypical antipsychotic drugs |
| Read codes (version 2) | d4rI. | ZALASTA 7.5mg tablets | Atypical antipsychotic drugs |
| Read codes (version 2) | d4rJ. | ZALASTA 15mg tablets | Atypical antipsychotic drugs |
| Read codes (version 2) | d4rK. | ZALASTA 20mg tablets | Atypical antipsychotic drugs |
| Read codes (version 2) | d4rL. | ZALASTA 5mg dispersible tablets | Atypical antipsychotic drugs |
| Read codes (version 2) | d4rM. | ZALASTA 10mg dispersible tablets | Atypical antipsychotic drugs |
| Read codes (version 2) | d4rN. | ZALASTA 15mg dispersible tablets | Atypical antipsychotic drugs |
| Read codes (version 2) | d4rO. | ZALASTA 20mg dispersible tablets | Atypical antipsychotic drugs |
| Read codes (version 2) | d4rP. | ZALASTA 10mg tablets | Atypical antipsychotic drugs |
| Read codes (version 2) | d4rt. | OLANZAPINE 20mg tablets | Atypical antipsychotic drugs |
| Read codes (version 2) | d4ru. | OLANZAPINE 20mg dispersible tablets | Atypical antipsychotic drugs |
| Read codes (version 2) | d4rv. | OLANZAPINE 10mg injection (pdr for recon) | Atypical antipsychotic drugs |
| Read codes (version 2) | d4rw. | OLANZAPINE 15mg dispersible tablets | Atypical antipsychotic drugs |
| Read codes (version 2) | d4rx. | OLANZAPINE 15mg tablets | Atypical antipsychotic drugs |
| Read codes (version 2) | d4ry. | OLANZAPINE 5mg dispersible tablets | Atypical antipsychotic drugs |
| Read codes (version 2) | d4rz. | OLANZAPINE 10mg dispersible tablets | Atypical antipsychotic drugs |
| Read codes (version 2) | d4s.. | QUETIAPINE | Atypical antipsychotic drugs |
| Read codes (version 2) | d4s1. | QUETIAPINE 25mg tablets | Atypical antipsychotic drugs |
| Read codes (version 2) | d4s2. | QUETIAPINE 100mg tablets | Atypical antipsychotic drugs |
| Read codes (version 2) | d4s3. | QUETIAPINE 200mg tablets | Atypical antipsychotic drugs |
| Read codes (version 2) | d4s4. | QUETIAPINE 25mg+100mg tablets starter pack | Atypical antipsychotic drugs |
| Read codes (version 2) | d4s5. | SEROQUEL 25mg tablets | Atypical antipsychotic drugs |
| Read codes (version 2) | d4s6. | SEROQUEL 100mg tablets | Atypical antipsychotic drugs |
| Read codes (version 2) | d4s7. | SEROQUEL 200mg tablets | Atypical antipsychotic drugs |
| Read codes (version 2) | d4s8. | SEROQUEL 25mg+100mg tablets starter pack | Atypical antipsychotic drugs |
| Read codes (version 2) | d4s9. | SEROQUEL 150mg tablets | Atypical antipsychotic drugs |
| Read codes (version 2) | d4sA. | SEROQUEL 25mg+100mg+150mg tablets starter pack | Atypical antipsychotic drugs |
| Read codes (version 2) | d4sB. | SEROQUEL 300mg tablets | Atypical antipsychotic drugs |
| Read codes (version 2) | d4sC. | SEROQUEL XL 50mg m/r tablets | Atypical antipsychotic drugs |
| Read codes (version 2) | d4sD. | SEROQUEL XL 200mg m/r tablets | Atypical antipsychotic drugs |
| Read codes (version 2) | d4sE. | SEROQUEL XL 300mg m/r tablets | Atypical antipsychotic drugs |
| Read codes (version 2) | d4sF. | SEROQUEL XL 400mg m/r tablets | Atypical antipsychotic drugs |
| Read codes (version 2) | d4sG. | SEROQUEL XL 150mg m/r tablets | Atypical antipsychotic drugs |
| Read codes (version 2) | d4ss. | QUETIAPINE 150mg m/r tablets | Atypical antipsychotic drugs |
| Read codes (version 2) | d4st. | QUETIAPINE 400mg m/r tablets | Atypical antipsychotic drugs |
| Read codes (version 2) | d4su. | QUETIAPINE 300mg m/r tablets | Atypical antipsychotic drugs |
| Read codes (version 2) | d4sv. | QUETIAPINE 200mg m/r tablets | Atypical antipsychotic drugs |
| Read codes (version 2) | d4sw. | QUETIAPINE 50mg m/r tablets | Atypical antipsychotic drugs |
| Read codes (version 2) | d4sx. | QUETIAPINE 300mg tablets | Atypical antipsychotic drugs |
| Read codes (version 2) | d4sy. | QUETIAPINE 25mg+100mg+150mg tablets starter pack | Atypical antipsychotic drugs |
| Read codes (version 2) | d4sz. | QUETIAPINE 150mg tablets | Atypical antipsychotic drugs |
| Read codes (version 2) | d4t.. | AMISULPRIDE | Atypical antipsychotic drugs |
| Read codes (version 2) | d4t1. | AMISULPRIDE 50mg tablets | Atypical antipsychotic drugs |
| Read codes (version 2) | d4t2. | AMISULPRIDE 200mg tablets | Atypical antipsychotic drugs |
| Read codes (version 2) | d4t3. | SOLIAN 50mg tablets | Atypical antipsychotic drugs |
| Read codes (version 2) | d4t4. | SOLIAN 200mg tablets | Atypical antipsychotic drugs |
| Read codes (version 2) | d4t5. | SOLIAN 400mg tablets | Atypical antipsychotic drugs |
| Read codes (version 2) | d4t6. | SOLIAN 100mg/mL sugar free oral solution | Atypical antipsychotic drugs |
| Read codes (version 2) | d4t7. | SOLIAN 100mg tablets | Atypical antipsychotic drugs |
| Read codes (version 2) | d4tx. | AMISULPRIDE 100mg tablets | Atypical antipsychotic drugs |
| Read codes (version 2) | d4ty. | AMISULPRIDE 100mg/mL sugar free oral solution | Atypical antipsychotic drugs |
| Read codes (version 2) | d4tz. | AMISULPRIDE 400mg tablets | Atypical antipsychotic drugs |
| Read codes (version 2) | d4u.. | ZOTEPINE | Atypical antipsychotic drugs |
| Read codes (version 2) | d4u1. | *ZOTEPINE 25mg tablets | Atypical antipsychotic drugs |
| Read codes (version 2) | d4u2. | *ZOTEPINE 50mg tablets | Atypical antipsychotic drugs |
| Read codes (version 2) | d4u3. | *ZOTEPINE 100mg tablets | Atypical antipsychotic drugs |
| Read codes (version 2) | d4u4. | *ZOLEPTIL 25mg tablets | Atypical antipsychotic drugs |
| Read codes (version 2) | d4u5. | *ZOLEPTIL 50mg tablets | Atypical antipsychotic drugs |
| Read codes (version 2) | d4u6. | *ZOLEPTIL 100mg tablets | Atypical antipsychotic drugs |
| Read codes (version 2) | d4v.. | ARIPIPRAZOLE | Atypical antipsychotic drugs |
| Read codes (version 2) | d4v1. | ABILIFY 10mg tablets | Atypical antipsychotic drugs |
| Read codes (version 2) | d4v2. | ABILIFY 15mg tablets | Atypical antipsychotic drugs |
| Read codes (version 2) | d4v3. | ABILIFY 30mg tablets | Atypical antipsychotic drugs |
| Read codes (version 2) | d4v4. | ABILIFY 5mg tablets | Atypical antipsychotic drugs |
| Read codes (version 2) | d4v5. | ABILIFY 10mg oro-dispersible tablets | Atypical antipsychotic drugs |
| Read codes (version 2) | d4v6. | ABILIFY 15mg oro-dispersible tablets | Atypical antipsychotic drugs |
| Read codes (version 2) | d4v7. | ABILIFY 1mg/mL oral solution | Atypical antipsychotic drugs |
| Read codes (version 2) | d4v8. | ABILIFY 9.75mg/1.3mL solution for injection | Atypical antipsychotic drugs |
| Read codes (version 2) | d4vs. | ARIPIPRAZOLE 9.75mg/1.3mL solution for injection | Atypical antipsychotic drugs |
| Read codes (version 2) | d4vt. | ARIPIPRAZOLE 1mg/mL oral solution | Atypical antipsychotic drugs |
| Read codes (version 2) | d4vu. | ARIPIPRAZOLE 10mg oro-dispersible tablets | Atypical antipsychotic drugs |
| Read codes (version 2) | d4vv. | ARIPIPRAZOLE 15mg oro-dispersible tablets | Atypical antipsychotic drugs |
| Read codes (version 2) | d4vw. | ARIPIPRAZOLE 5mg tablets | Atypical antipsychotic drugs |
| Read codes (version 2) | d4vx. | ARIPIPRAZOLE 30mg tablets | Atypical antipsychotic drugs |
| Read codes (version 2) | d4vy. | ARIPIPRAZOLE 15mg tablets | Atypical antipsychotic drugs |
| Read codes (version 2) | d4vz. | ARIPIPRAZOLE 10mg tablets | Atypical antipsychotic drugs |
| Read codes (version 2) | d4w.. | PALIPERIDONE | Atypical antipsychotic drugs |
| Read codes (version 2) | d4w1. | INVEGA 3mg m/r tablets | Atypical antipsychotic drugs |
| Read codes (version 2) | d4w2. | INVEGA 6mg m/r tablets | Atypical antipsychotic drugs |
| Read codes (version 2) | d4w3. | INVEGA 9mg m/r tablets | Atypical antipsychotic drugs |
| Read codes (version 2) | d4w4. | *INVEGA 12mg m/r tablets | Atypical antipsychotic drugs |
| Read codes (version 2) | d4w5. | XEPLION 50mg suspension for injection prefilled syringe | Atypical antipsychotic drugs |
| Read codes (version 2) | d4w6. | XEPLION 75mg suspension for injection prefilled syringe | Atypical antipsychotic drugs |
| Read codes (version 2) | d4w7. | XEPLION 100mg suspension for injection prefilled syringe | Atypical antipsychotic drugs |
| Read codes (version 2) | d4w8. | XEPLION 150mg suspension for injection prefilled syringe | Atypical antipsychotic drugs |
| Read codes (version 2) | d4ws. | PALIPERIDONE 150mg suspension for injection pfs | Atypical antipsychotic drugs |
| Read codes (version 2) | d4wt. | PALIPERIDONE 100mg suspension for injection pfs | Atypical antipsychotic drugs |
| Read codes (version 2) | d4wu. | PALIPERIDONE 75mg suspension for injection prefilled syringe | Atypical antipsychotic drugs |
| Read codes (version 2) | d4wv. | PALIPERIDONE 50mg suspension for injection prefilled syringe | Atypical antipsychotic drugs |
| Read codes (version 2) | d4ww. | *PALIPERIDONE 12mg m/r tablets | Atypical antipsychotic drugs |
| Read codes (version 2) | d4wx. | PALIPERIDONE 9mg m/r tablets | Atypical antipsychotic drugs |
| Read codes (version 2) | d4wy. | PALIPERIDONE 6mg m/r tablets | Atypical antipsychotic drugs |
| Read codes (version 2) | d4wz. | PALIPERIDONE 3mg m/r tablets | Atypical antipsychotic drugs |
| Read codes (version 2) | d4x.. | ASENAPINE | Atypical antipsychotic drugs |
| Read codes (version 2) | d4x1. | SYCREST 5mg sublingual tablets | Atypical antipsychotic drugs |
| Read codes (version 2) | d4x2. | ASENAPINE 5mg sublingual tablets | Atypical antipsychotic drugs |
| Read codes (version 2) | d4x3. | SYCREST 10mg sublingual tablets | Atypical antipsychotic drugs |
| Read codes (version 2) | d4x4. | ASENAPINE 10mg sublingual tablets | Atypical antipsychotic drugs |
| Read codes (version 2) | d58.. | OLANZAPINE PAMOATE | Atypical antipsychotic drugs |
| Read codes (version 2) | d581. | ZYPADHERA 210mg powder+solvent for suspension for injection | Atypical antipsychotic drugs |
| Read codes (version 2) | d582. | ZYPADHERA 300mg powder+solvent for suspension for injection | Atypical antipsychotic drugs |
| Read codes (version 2) | d583. | ZYPADHERA 405mg powder+solvent for suspension for injection | Atypical antipsychotic drugs |
| Read codes (version 2) | d58x. | OLANZAPINE 405mg powder+solvent for suspension for injection | Atypical antipsychotic drugs |
| Read codes (version 2) | d58y. | OLANZAPINE 300mg powder+solvent for suspension for injection | Atypical antipsychotic drugs |
| Read codes (version 2) | d58z. | OLANZAPINE 210mg powder+solvent for suspension for injection | Atypical antipsychotic drugs |
| Codes used to identify PwP with depression or/and on antidepressants (applied after the initial extraction of PD cases in the first step. | | | |
| Read codes (version 2) | 1B17.00 | Depressed | Depression codes |
| Read codes (version 2) | 1B17.11 | C/O - feeling depressed | Depression codes |
| Read codes (version 2) | 1B1U.00 | Symptoms of depression | Depression codes |
| Read codes (version 2) | 1B1U.11 | Depressive symptoms | Depression codes |
| Read codes (version 2) | 1BQ..00 | Loss of capacity for enjoyment | Depression codes |
| Read codes (version 2) | 1BT..00 | Depressed mood | Depression codes |
| Read codes (version 2) | 1BT..11 | Low mood | Depression codes |
| Read codes (version 2) | 1BU.. | Loss of hope for the future | Depression codes |
| Read codes (version 2) | 2257.00 | O/E - depressed | Depression codes |
| Read codes (version 2) | 8BK0.00 | Depression management programme | Depression codes |
| Read codes (version 2) | 8CAa.00 | Patient given advice about management of depression | Depression codes |
| Read codes (version 2) | 8HHq.00 | Referral for guided self-help for depression | Depression codes |
| Read codes (version 2) | 9H90.00 | Depression annual review | Depression codes |
| Read codes (version 2) | 9H91.00 | Depression medication review | Depression codes |
| Read codes (version 2) | 9H92.00 | Depression interim review | Depression codes |
| Read codes (version 2) | 9HA0.00 | On depression register | Depression codes |
| Read codes (version 2) | 9Ov..00 | Depression monitoring administration | Depression codes |
| Read codes (version 2) | 9Ov0.00 | Depression monitoring first letter | Depression codes |
| Read codes (version 2) | 9Ov1.00 | Depression monitoring second letter | Depression codes |
| Read codes (version 2) | 9Ov2.00 | Depression monitoring third letter | Depression codes |
| Read codes (version 2) | 9Ov3.00 | Depression monitoring verbal invite | Depression codes |
| Read codes (version 2) | 9Ov4.00 | Depression monitoring telephone invite | Depression codes |
| Read codes (version 2) | 9kQ..00 | On full dose long term treatment for depression | Depression codes |
| Read codes (version 2) | E11..12 | Depressive psychoses | Depression codes |
| Read codes (version 2) | E112.00 | Single major depressive episode | Depression codes |
| Read codes (version 2) | E112.11 | Agitated depression | Depression codes |
| Read codes (version 2) | d831. | Marplan 10mg tablet | Monoamine-oxidase inhibitors antidepressants |
| Read codes (version 2) | d83z. | Isocarboxazid 10mg tablet | Monoamine-oxidase inhibitors antidepressants |
| Read codes (version 2) | d84.. | tranylcypromine | Monoamine-oxidase inhibitors antidepressants |
| Read codes (version 2) | d841. | Parnate 10mg tablet | Monoamine-oxidase inhibitors antidepressants |
| Read codes (version 2) | d84z. | Tranylcypromine 10mg tablet | Monoamine-oxidase inhibitors antidepressants |
| Read codes (version 2) | d85.. | moclobemide | Monoamine-oxidase inhibitors antidepressants |
| Read codes (version 2) | d851. | Manerix 150mg tablet | Monoamine-oxidase inhibitors antidepressants |
| Read codes (version 2) | d852. | Moclobemide 150mg tablet | Monoamine-oxidase inhibitors antidepressants |
| Read codes (version 2) | d853. | Manerix 300mg tablet | Monoamine-oxidase inhibitors antidepressants |
| Read codes (version 2) | d854. | Moclobemide 300mg tablet | Monoamine-oxidase inhibitors antidepressants |
| Read codes (version 2) | da2.. | tryptophan | Other antidepressants |
| Read codes (version 2) | da22. | Optimax 500mg tablet | Other antidepressants |
| Read codes (version 2) | da23. | Optimax 1g/6g powder | Other antidepressants |
| Read codes (version 2) | da24. | Optimax WV 500mg tablets | Other antidepressants |
| Read codes (version 2) | da2y. | Pacitron 500mg tablet | Other antidepressants |
| Read codes (version 2) | da2z. | Tryptophan 500mg tablet | Other antidepressants |
| Read codes (version 2) | da22. | Tryptophan 1g/6g powder | Other antidepressants |
| Read codes (version 2) | da7.. | venlafaxine | Other antidepressants |
| Read codes (version 2) | da71. | Venlafaxine 37.5mg tablet | Other antidepressants |
| Read codes (version 2) | da72. | Venlafaxine 75mg tablet | Other antidepressants |
| Read codes (version 2) | da73. | Efexor 37.5mg tablet | Other antidepressants |
| Read codes (version 2) | da74. | Efexor 75mg tablet | Other antidepressants |
| Read codes (version 2) | da75. | Venlafaxine 50mg tablet | Other antidepressants |
| Read codes (version 2) | da76. | Efexor 50mg tablet | Other antidepressants |
| Read codes (version 2) | da77. | Venlafaxine 75mg m/r capsule | Other antidepressants |
| Read codes (version 2) | da78. | Efexor XL 75mg m/r capsule | Other antidepressants |
| Read codes (version 2) | da79. | Venlafaxine 150mg m/r capsule | Other antidepressants |
| Read codes (version 2) | da7A. | Efexor XL 150mg m/r capsule | Other antidepressants |
| Read codes (version 2) | da7a. | VENAXX XL 150mg m/r capsules | Other antidepressants |
| Read codes (version 2) | da7B. | RODOMEL XL 75mg m/r capsules | Other antidepressants |
| Read codes (version 2) | da7b. | VAXALIN XL 75mg m/r capsules | Other antidepressants |
| Read codes (version 2) | da7C. | RODOMEL XL 150mg m/r capsules | Other antidepressants |
| Read codes (version 2) | da7c. | VAXALIN XL 150mg m/r capsules | Other antidepressants |
| Read codes (version 2) | da7D. | WINFEX XL 75mg m/r capsules | Other antidepressants |
| Read codes (version 2) | da7d. | ALVENTA XL 75mg m/r capsules | Other antidepressants |
| Read codes (version 2) | da7E. | WINFEX XL 150mg m/r capsules | Other antidepressants |
| Read codes (version 2) | da7e. | ALVENTA XL 150mg m/r capsules | Other antidepressants |
| Read codes (version 2) | da7F. | TRIXAT XL 75mg m/r capsules | Other antidepressants |
| Read codes (version 2) | da7f. | RANFAXINE XL 150mg m/r caps | Other antidepressants |
| Read codes (version 2) | da7G. | TRIXAT XL 150mg m/r capsules | Other antidepressants |
| Read codes (version 2) | da7g. | RANFAXINE XL 75mg m/r capsules | Other antidepressants |
| Read codes (version 2) | da7H. | VIEPAX XL 75mg m/r tablets | Other antidepressants |
| Read codes (version 2) | da7h. | BONILUX XL 75mg m/r capsules | Other antidepressants |
| Read codes (version 2) | da7I. | VENLAFAXINE 75mg m/r tablets | Other antidepressants |
| Read codes (version 2) | da7i. | BONILUX XL 150mg m/r capsules | Other antidepressants |
| Read codes (version 2) | da7J. | VIEPAX XL 150mg m/r tablets | Other antidepressants |
| Read codes (version 2) | da7j. | TONPULAR XL 75mg m/r capsules | Other antidepressants |
| Read codes (version 2) | da7K. | VENLAFAXINE 150mg m/r tablets | Other antidepressants |
| Read codes (version 2) | da7k. | TONPULAR XL 150mg m/r capsules | Other antidepressants |
| Read codes (version 2) | da7L. | TARDCAPS XL 75mg m/r capsules | Other antidepressants |
| Read codes (version 2) | da7l. | FORAVEN XL 75mg m/r capsules | Other antidepressants |
| Read codes (version 2) | da7M. | TARDCAPS XL 150mg m/r capsules | Other antidepressants |
| Read codes (version 2) | da7m. | FORAVEN XL 150mg m/r capsules | Other antidepressants |
| Read codes (version 2) | da7N. | VIEPAX 37.5mg tablets | Other antidepressants |
| Read codes (version 2) | da7n. | DEPEFEX XL 75mg m/r capsules | Other antidepressants |
| Read codes (version 2) | da7O. | VIEPAX 75mg tablets | Other antidepressants |
| Read codes (version 2) | da7o. | DEPEFEX XL 150mg m/r capsules | Other antidepressants |
| Read codes (version 2) | da7P. | VENSIR XL 75mg m/r capsules | Other antidepressants |
| Read codes (version 2) | da7p. | VENLALIC XL 37.5mg m/r tablets | Other antidepressants |
| Read codes (version 2) | da7Q. | VENSIR XL 150mg m/r capsules | Other antidepressants |
| Read codes (version 2) | da7q. | VENLAFAXINE 37.5mg m/r tablets | Other antidepressants |
| Read codes (version 2) | da7R. | TIFAXIN XL 75mg m/r capsules | Other antidepressants |
| Read codes (version 2) | da7r. | SUNVENIZ XL 75mg m/r tablets | Other antidepressants |
| Read codes (version 2) | da7S. | TIFAXIN XL 150mg m/r capsules | Other antidepressants |
| Read codes (version 2) | da7s. | SUNVENIZ XL 150mg m/r tablets | Other antidepressants |
| Read codes (version 2) | da7T. | VEXARIN XL 75mg m/r capsules | Other antidepressants |
| Read codes (version 2) | da7t. | VENLADEX XL 75mg m/r tablets | Other antidepressants |
| Read codes (version 2) | da7U. | VEXARIN XL 150mg m/r capsules | Other antidepressants |
| Read codes (version 2) | da7u. | VENLADEX XL 150mg m/r tablets | Other antidepressants |
| Read codes (version 2) | da7V. | VENLALIC XL 75mg m/r tablets | Other antidepressants |
| Read codes (version 2) | da7v. | EFEXOR XL 225mg m/r capsules | Other antidepressants |
| Read codes (version 2) | da7W. | VENLALIC XL 150mg m/r tablets | Other antidepressants |
| Read codes (version 2) | da7w. | VENLAFAXINE 225mg m/r capsules | Other antidepressants |
| Read codes (version 2) | da7X. | VENLALIC XL 225mg m/r tablets | Other antidepressants |
| Read codes (version 2) | da7Y. | VENLAFAXINE 225mg m/r tablets | Other antidepressants |
| Read codes (version 2) | da7Z. | VENAXX XL 75mg m/r capsules | Other antidepressants |
| Read codes (version 2) | da8. | nefazodone | Other antidepressants |
| Read codes (version 2) | da81. | Nefazodone HCl 100mg tablet | Other antidepressants |
| Read codes (version 2) | da82. | Nefazodone HCl 200mg tablet | Other antidepressants |
| Read codes (version 2) | da83. | Dutonin 100mg tablet | Other antidepressants |
| Read codes (version 2) | da84. | Dutonin 200mg tablet | Other antidepressants |
| Read codes (version 2) | da85. | Nefazodone initiation tab pack | Other antidepressants |
| Read codes (version 2) | da86. | Dutonin initiation tab pack | Other antidepressants |
| Read codes (version 2) | daA.. | reboxetine | Other antidepressants |
| Read codes (version 2) | daA1. | Reboxetine 4mg tablet | Other antidepressants |
| Read codes (version 2) | daA2. | Edronax 4mg tablet | Other antidepressants |
| Read codes (version 2) | daB.. | mirtazapine | Other antidepressants |
| Read codes (version 2) | daB1. | Mirtazapine 30mg tablet | Other antidepressants |
| Read codes (version 2) | daB2. | Zispin 30mg tablet | Other antidepressants |
| Read codes (version 2) | daB3. | Mirtazapine 30mg disp tab | Other antidepressants |
| Read codes (version 2) | daB4. | Zispin SolTab 30mg disp tab | Other antidepressants |
| Read codes (version 2) | daB5. | Mirtazapine 15mg disp tab | Other antidepressants |
| Read codes (version 2) | daB6. | Zispin SolTab 15mg disp tab | Other antidepressants |
| Read codes (version 2) | daB7. | Mirtazapine 45mg disp tab | Other antidepressants |
| Read codes (version 2) | daB8. | Zispin SolTab 45mg disp tab | Other antidepressants |
| Read codes (version 2) | daBy. | Mirtazapine 45mg tablet | Other antidepressants |
| Read codes (version 2) | daBz. | Mirtazapine 15mg tablet | Other antidepressants |
| Read codes (version 2) | daD.. | agomelatine | Other antidepressants |
| Read codes (version 2) | daD1. | VALDOXAN 25mg tablets | Other antidepressants |
| Read codes (version 2) | daD2. | AGOMELATINE 25mg tablets | Other antidepressants |
| Read codes (version 2) | daE. | vortioxetine | Other antidepressants |
| Read codes (version 2) | daE1. | BRINTELLIX 5mg tablets | Other antidepressants |
| Read codes (version 2) | daE2. | VORTIOXETINE 5mg tablets | Other antidepressants |
| Read codes (version 2) | daE3. | BRINTELLIX 10mg tablets | Other antidepressants |
| Read codes (version 2) | daE4. | VORTIOXETINE 10mg tablets | Other antidepressants |
| Read codes (version 2) | daE5. | BRINTELLIX 20mg tablets | Other antidepressants |
| Read codes (version 2) | daE6. | VORTIOXETINE 20mg tablets | Other antidepressants |
| Read codes (version 2) | gde.. | duloxetine | Other antidepressants |
| Read codes (version 2) | gde1. | Yentreve 20mg g/r capsule | Other antidepressants |
| Read codes (version 2) | gde2. | Yentreve 40mg g/r capsule | Other antidepressants |
| Read codes (version 2) | gde3. | Cymbalta 30mg g/r capsule | Other antidepressants |
| Read codes (version 2) | gde4. | Cymbalta 60mg g/r capsule | Other antidepressants |
| Read codes (version 2) | gdew. | Duloxetine 60mg g/r capsule | Other antidepressants |
| Read codes (version 2) | gdex. | Duloxetine 30mg g/r capsule | Other antidepressants |
| Read codes (version 2) | gdey. | Duloxetine 20mg g/r capsule | Other antidepressants |
| Read codes (version 2) | gdez. | Duloxetine 40mg g/r capsule | Other antidepressants |
| Codes used to identify PwP with dementia or/and on antidementia drugs (applied after the initial extraction of PD cases in the first step. | | | |
| Read codes (version 2) | 1B1A.12 | Memory loss symptom | Memory problems |
| Read codes (version 2) | 1B1A.13 | Memory disturbance | Memory problems |
| Read codes (version 2) | 1B1Y.00 | Poor visual sequential memory | Memory problems |
| Read codes (version 2) | 1B1a.00 | Poor auditory sequential memory | Memory problems |
| Read codes (version 2) | 1S21.00 | Disturbance of memory for order of events | Memory problems |
| Read codes (version 2) | 28G..00 | Forgetful | memory problems |
| Read codes (version 2) | 3A10.00 | Memory: own age not known | Memory problems |
| Read codes (version 2) | 3A20.00 | Memory: present time not known | Memory problems |
| Read codes (version 2) | 3A30.00 | Memory: present place not knwn | Memory problems |
| Read codes (version 2) | 3A40.00 | Memory: present year not known | Memory problems |
| Read codes (version 2) | 3A50.00 | Memory: own DOB not known | Memory problems |
| Read codes (version 2) | 3A60.00 | Memory: present month not knwn | Memory problems |
| Read codes (version 2) | 3A70.00 | Memory: important event not kn | Memory problems |
| Read codes (version 2) | 3A80.00 | Memory: import.person not knwn | Memory problems |
| Read codes (version 2) | 3A91.00 | Memory: count down unsuccess. | Memory problems |
| Read codes (version 2) | 3AA1.00 | Memory: address recall unsucc. | Memory problems |
| Read codes (version 2) | 8BIk.00 | Patient forgets to take medication | Memory problems |
| Read codes (version 2) | 8HTY.00 | Referral to memory clinic | Memory problems |
| Read codes (version 2) | 9Nk1.00 | Seen in memory clinic | Memory problems |
| Read codes (version 2) | E2A1000 | Mild memory disturbance | Memory problems |
| Read codes (version 2) | E2A1100 | Organic memory impairment | Memory problems |
| Read codes (version 2) | R00z011 | [D]Memory deficit | Memory problems |
| Read codes (version 2) | Z7A1300 | Memory skills training | Memory problems |
| Read codes (version 2) | Z7A1500 | Memory retraining | Memory problems |
| Read codes (version 2) | Z7CA100 | Isolated memory skills | Memory problems |
| Read codes (version 2) | Z7CE412 | Memory loss symptom | Memory problems |
| Read codes (version 2) | Z7CE414 | Memory disturbance | Memory problems |
| Read codes (version 2) | Z7CE415 | Loss of memory | Memory problems |
| Read codes (version 2) | Z7CE500 | Forgetful | Memory problems |
| Read codes (version 2) | Z7CE611 | Memory loss | Memory problems |
| Read codes (version 2) | Z7CE612 | Memory gone | Memory problems |
| Read codes (version 2) | Z7CE613 | Dysmnesia | Memory problems |
| Read codes (version 2) | Z7CE615 | Loss of memory | Memory problems |
| Read codes (version 2) | Z7CE616 | LOM - Loss of memory | Memory problems |
| Read codes (version 2) | Z7CEA00 | Impairment of registration | Memory problems |
| Read codes (version 2) | Z7CEA11 | Impairment of working memory | Memory problems |
| Read codes (version 2) | Z7CEA12 | Impairment of immediate recall | Memory problems |
| Read codes (version 2) | Z7CEA13 | Impairment of primary memory | Memory problems |
| Read codes (version 2) | Z7CEB11 | Loss of memory for remote events | Memory problems |
| Read codes (version 2) | Z7CEB12 | Poor memory for remote events | Memory problems |
| Read codes (version 2) | Z7CEC11 | Loss of memory for recent events | Memory problems |
| Read codes (version 2) | Z7CEC12 | No memory for recent events | Memory problems |
| Read codes (version 2) | Z7CEH00 | Memory impairment | Memory problems |
| Read codes (version 2) | Z7CEH11 | Memory dysfunction | Memory problems |
| Read codes (version 2) | Z7CEH12 | Memory deficit | Memory problems |
| Read codes (version 2) | Z7CEH13 | Bad memory | Memory problems |
| Read codes (version 2) | Z7CEH14 | Memory problem | Memory problems |
| Read codes (version 2) | Z7CEH15 | Poor memory | Memory problems |
| Read codes (version 2) | Z7CEI00 | Mixes past with present | Memory problems |
| Read codes (version 2) | Z7CEJ00 | Memory lapses | Memory problems |
| Read codes (version 2) | Z7CEK00 | Minor memory lapses | Memory problems |
| Read codes (version 2) | Z7CEL00 | Mild memory disturbance | Memory problems |
| Read codes (version 2) | Z7CEM00 | Distortion of memory | Memory problems |
| Read codes (version 2) | Z7CEN00 | Confabulation | Memory problems |
| Read codes (version 2) | Z7CEN11 | Invents experiences to compensate for loss of memory | Memory problems |
| Read codes (version 2) | Z7CEO00 | Momentary confabulation | Memory problems |
| Read codes (version 2) | Z7CEP00 | Fantastical confabulation | Memory problems |
| Read codes (version 2) | Z7CF200 | Has delayed recall | Memory problems |
| Read codes (version 2) | Z7CF800 | Poor short-term memory | Memory problems |
| Read codes (version 2) | Z7CF811 | Short-term memory loss | Memory problems |
| Read codes (version 2) | Z7CFA00 | Unable to recall random address at five minutes | Memory problems |
| Read codes (version 2) | Z7CFC00 | Unable to recall five-digit number at five minutes | Memory problems |
| Read codes (version 2) | Z7CFE00 | Unable to reproduce geometric figure at five minutes | Memory problems |
| Read codes (version 2) | Z7CFF00 | Forgets what was going to do | Memory problems |
| Read codes (version 2) | Z7CFG00 | Forgets what was going to say | Memory problems |
| Read codes (version 2) | Z7CFH00 | Forgets recent activities | Memory problems |
| Read codes (version 2) | Z7CFI00 | Forgets what has just done | Memory problems |
| Read codes (version 2) | Z7CFJ00 | Forgets what has just said | Memory problems |
| Read codes (version 2) | Z7CFK00 | Forgets what has just read | Memory problems |
| Read codes (version 2) | Z7CFL00 | Forgets what has just seen | Memory problems |
| Read codes (version 2) | Z7CFM00 | Forgets what has just heard | Memory problems |
| Read codes (version 2) | Z7CFO00 | Poor long-term memory | Memory problems |
| Read codes (version 2) | Z7CFO11 | Long-term memory loss | Memory problems |
| Read codes (version 2) | Z7CFQ00 | Unable to remember own date of birth | Memory problems |
| Read codes (version 2) | Z7CFS00 | Unable to remember own age | Memory problems |
| Read codes (version 2) | Z7CFS11 | Cannot remember own age | Memory problems |
| Read codes (version 2) | Z7CFU00 | Unable to remember day of the week | Memory problems |
| Read codes (version 2) | Z7CFW00 | Unable to remember today's date | Memory problems |
| Read codes (version 2) | Z7CFW11 | Cannot remember today's date | Memory problems |
| Read codes (version 2) | Z7CFY00 | Unable to remember month of year | Memory problems |
| Read codes (version 2) | Z7CFa00 | Unable to remember current year | Memory problems |
| Read codes (version 2) | Z7CFc00 | Unable to remember name of reigning monarch | Memory problems |
| Read codes (version 2) | Z7CFc11 | Cannot remember reigning monarch | Memory problems |
| Read codes (version 2) | Z7CFc12 | Unable to remember name of current monarch | Memory problems |
| Read codes (version 2) | Z7CFe00 | Unable to remember name of current prime minister | Memory problems |
| Read codes (version 2) | Z7CFe11 | Cannot remember current prime minister | Memory problems |
| Read codes (version 2) | Z7CFf00 | Cannot remember name of school | Memory problems |
| Read codes (version 2) | Z7CFg00 | Cannot remember names of intimates | Memory problems |
| Read codes (version 2) | Z7CFh00 | Cannot remember birth dates of children | Memory problems |
| Read codes (version 2) | Z7CFi00 | Cannot remember wedding anniversary | Memory problems |
| Read codes (version 2) | Z7CFk00 | Unable to remember objects | Memory problems |
| Read codes (version 2) | Z7CFm00 | Unable to remember faces | Memory problems |
| Read codes (version 2) | Z7CFo00 | Unable to remember sounds | Memory problems |
| Read codes (version 2) | Z7CFq00 | Unable to remember motor skills | Memory problems |
| Read codes (version 2) | Z7CFs00 | Unable to remember new motor skills | Memory problems |
| Read codes (version 2) | Z7CFu00 | Unable to remember old motor skills | Memory problems |
| Read codes (version 2) | Z7CFw00 | Memory aided by use of diary | Memory problems |
| Read codes (version 2) | Z7CFx00 | Memory aided by use of labels | Memory problems |
| Read codes (version 2) | Z7CFz00 | Memory aided by use of lists | Memory problems |
| Read codes (version 2) | Z7CGP00 | Delayed verbal memory | Memory problems |
| Read codes (version 2) | ZD11300 | Auditory memory therapy | Memory problems |
| Read codes (version 2) | E00..00 | Senile and presenile organic psychotic conditions | Possible Alzheimer's disease |
| Read codes (version 2) | E00..11 | Senile dementia | Possible Alzheimer's disease |
| Read codes (version 2) | E00..12 | Senile/presenile dementia | Possible Alzheimer's disease |
| Read codes (version 2) | E000.00 | Uncomplicated senile dementia | Possible Alzheimer's disease |
| Read codes (version 2) | E001.00 | Presenile dementia | Possible Alzheimer's disease |
| Read codes (version 2) | E001000 | Uncomplicated presenile dementia | Possible Alzheimer's disease |
| Read codes (version 2) | E001100 | Presenile dementia with delirium | Possible Alzheimer's disease |
| Read codes (version 2) | E001200 | Presenile dementia with paranoia | Possible Alzheimer's disease |
| Read codes (version 2) | E001300 | Presenile dementia with depression | Possible Alzheimer's disease |
| Read codes (version 2) | E001z00 | Presenile dementia NOS | Possible Alzheimer's disease |
| Read codes (version 2) | E002.00 | Senile dementia with depressive or paranoid features | Possible Alzheimer's disease |
| Read codes (version 2) | E002000 | Senile dementia with paranoia | Possible Alzheimer's disease |
| Read codes (version 2) | E002100 | Senile dementia with depression | Possible Alzheimer's disease |
| Read codes (version 2) | E002z00 | Senile dementia with depressive or paranoid features NOS | Possible Alzheimer's disease |
| Read codes (version 2) | E003.00 | Senile dementia with delirium | Possible Alzheimer's disease |
| Read codes (version 2) | E00z.00 | Senile or presenile psychoses NOS | Possible Alzheimer's disease |
| Read codes (version 2) | Eu02z11 | [X] Presenile dementia NOS | Possible Alzheimer's disease |
| Read codes (version 2) | Eu02z12 | [X] Presenile psychosis NOS | Possible Alzheimer's disease |
| Read codes (version 2) | Eu02z14 | [X] Senile dementia NOS | Possible Alzheimer's disease |
| Read codes (version 2) | Eu02z15 | [X] Senile psychosis NOS | Possible Alzheimer's disease |
| Read codes (version 2) | Eu02z16 | [X] Senile dementia, depressed or paranoid type | Possible Alzheimer's disease |
| Read codes (version 2) | Eu05700 | [X]Mild cognitive disorder | Possible Alzheimer's disease |
| Read codes (version 2) | F11z.11 | Cerebral atrophy | Possible Alzheimer's disease |
| Read codes (version 2) | Eu00.00 | [X]Dementia in Alzheimer's disease | Probable Alzheimer's disease |
| Read codes (version 2) | Eu00000 | [X]Dementia in Alzheimer's disease with early onset | Probable Alzheimer's disease |
| Read codes (version 2) | Eu00011 | [X]Presenile dementia,Alzheimer's type | Probable Alzheimer's disease |
| Read codes (version 2) | Eu00012 | [X]Primary degen dementia, Alzheimer's type, presenile onset | Probable Alzheimer's disease |
| Read codes (version 2) | Eu00013 | [X]Alzheimer's disease type 2 | Probable Alzheimer's disease |
| Read codes (version 2) | Eu00100 | [X]Dementia in Alzheimer's disease with late onset | Probable Alzheimer's disease |
| Read codes (version 2) | Eu00111 | [X]Alzheimer's disease type 1 | Probable Alzheimer's disease |
| Read codes (version 2) | Eu00112 | [X]Senile dementia,Alzheimer's type | Probable Alzheimer's disease |
| Read codes (version 2) | Eu00113 | [X]Primary degen dementia of Alzheimer's type, senile onset | Probable Alzheimer's disease |
| Read codes (version 2) | Eu00200 | [X]Dementia in Alzheimer's dis, atypical or mixed type | Probable Alzheimer's disease |
| Read codes (version 2) | Eu00z00 | [X]Dementia in Alzheimer's disease, unspecified | Probable Alzheimer's disease |
| Read codes (version 2) | Eu00z11 | [X]Alzheimer's dementia unspec | Probable Alzheimer's disease |
| Read codes (version 2) | F110.00 | Alzheimer's disease | Probable Alzheimer's disease |
| Read codes (version 2) | F110000 | Alzheimer's disease with early onset | Probable Alzheimer's disease |
| Read codes (version 2) | F110100 | Alzheimer's disease with late onset | Probable Alzheimer's disease |
| Read codes (version 2) | Fyu3000 | [X]Other Alzheimer's disease | Probable Alzheimer's disease |
| Read codes (version 2) | 8BPa.00 | Antipsychotic drug therapy for dementia | Other dementia (non-Alzheimer's disease dementias) |
| Read codes (version 2) | E02y100 | Drug-induced dementia | Other dementia (non-Alzheimer's disease dementias) |
| Read codes (version 2) | Eu01111 | [X]Predominantly cortical dementia | Other dementia (non-Alzheimer's disease dementias) |
| Read codes (version 2) | Eu02000 | [X]Dementia in Pick's disease | Other dementia (non-Alzheimer's disease dementias) |
| Read codes (version 2) | Eu02100 | [X]Dementia in Creutzfeldt-Jakob disease | Other dementia (non Alzheimer's disease dementias) |
| Read codes (version 2) | Eu02200 | [X]Dementia in Huntington's disease | Other dementia (non-Alzheimer's disease dementias) |
| Read codes (version 2) | Eu02300 | [X]Dementia in Parkinson's disease | Other dementia (non Alzheimer's disease dementias) |
| Read codes (version 2) | Eu02400 | [X]Dementia in human immunodef virus [HIV] disease | Other dementia (non-Alzheimer's disease dementias) |
| Read codes (version 2) | Eu02500 | [X]Lewy body dementia | Other dementia (non-Alzheimer's disease dementias) |
| Read codes (version 2) | Eu04100 | [X]Delirium superimposed on dementia | Other dementia (non-Alzheimer's disease dementias) |
| Read codes (version 2) | F111.00 | Pick's disease | Other dementia (non-Alzheimer's disease dementias) |
| Read codes (version 2) | F116.00 | Lewy body disease | Other dementia (non-Alzheimer's disease dementias) |
| Read codes (version 2) | F11x200 | Cerebral degeneration due to cerebrovascular disease | Other dementia (non-Alzheimer's disease dementias) |
| Read codes (version 2) | E004.00 | Arteriosclerotic dementia | Vascular dementia (non-Alzheimer's disease dementias) |
| Read codes (version 2) | E004.11 | Multi infarct dementia | Vascular dementia (non-Alzheimer's disease dementias) |
| Read codes (version 2) | E004000 | Uncomplicated arteriosclerotic dementia | Vascular dementia (non-Alzheimer's disease dementias) |
| Read codes (version 2) | E004100 | Arteriosclerotic dementia with delirium | Vascular dementia (non-Alzheimer's disease dementias) |
| Read codes (version 2) | E004200 | Arteriosclerotic dementia with paranoia | Vascular dementia (non-Alzheimer's disease dementias) |
| Read codes (version 2) | E004300 | Arteriosclerotic dementia with depression | Vascular dementia (non-Alzheimer's disease dementias) |
| Read codes (version 2) | E004z00 | Arteriosclerotic dementia NOS | Vascular dementia (non-Alzheimer's disease dementias) |
| Read codes (version 2) | Eu01.00 | [X]Vascular dementia | Vascular dementia (non-Alzheimer's disease dementias) |
| Read codes (version 2) | Eu01.11 | [X]Arteriosclerotic dementia | Vascular dementia (non-Alzheimer's disease dementias) |
| Read codes (version 2) | Eu01000 | Eu01000 [X]Vascular dementia of acute onset | Vascular dementia (non-Alzheimer's disease dementias) |
| Read codes (version 2) | Eu01100 | [X]Multi-infarct dementia | Vascular dementia (non-Alzheimer's disease dementias) |
| Read codes (version 2) | Eu01200 | [X]Subcortical vascular dementia | Vascular dementia (non-Alzheimer's disease dementias) |
| Read codes (version 2) | Eu01300 | [X]Mixed cortical and subcortical vascular dementia | Vascular dementia (non-Alzheimer's disease dementias) |
| Read codes (version 2) | Eu01y00 | [X]Other vascular dementia | Vascular dementia (non-Alzheimer's disease dementias) |
| Read codes (version 2) | Eu01z00 | [X]Vascular dementia, unspecified | Vascular dementia (non-Alzheimer's disease dementias) |
| Read codes (version 2) | 6AB..00 | Dementia annual review | Non-specific dementia (non Alzheimer's disease dementias) |
| Read codes (version 2) | 9hD0.00 | Excepted from dementia quality indicators: Patient unsuitabl | Non-specific dementia (non-Alzheimer's disease dementias) |
| Read codes (version 2) | 9hD1.00 | Excepted from dementia quality indicators: Informed dissent | Non-specific dementia (non-Alzheimer's disease dementias) |
| Read codes (version 2) | E00y.00 | Other senile and presenile organic psychoses | Non-specific dementia (non-Alzheimer's disease dementias) |
| Read codes (version 2) | E041.00 | Dementia in conditions EC | Non-specific dementia (non-Alzheimer's disease dementias) |
| Read codes (version 2) | Eu02.00 | [X]Dementia in other diseases classified elsewhere | Non-specific dementia (non-Alzheimer's disease dementias) |
| Read codes (version 2) | Eu02y00 | [X]Dementia in other specified diseases classif elsewhere | Non-specific dementia (non-Alzheimer's disease dementias) |
| Read codes (version 2) | Eu02z00 | [X] Unspecified dementia | Non-specific dementia (non-Alzheimer's disease dementias) |
| Read codes (version 2) | Eu02z13 | [X] Primary degenerative dementia NOS | Non-specific dementia (non-Alzheimer's disease dementias) |
| Read codes (version 2) | F112.00 | Senile degeneration of brain | Non-specific dementia (non-Alzheimer's disease dementias) |
| Read codes (version 2) | dy1.. | Donepezil Hydrochloride | Drugs for dementia |
| Read codes (version 2) | dy11. | Donepezil HCl 5mg tablet | Drugs for dementia |
| Read codes (version 2) | dy12. | Donepezil HCl 10mg tablet | Drugs for dementia |
| Read codes (version 2) | dy13. | Aricept 5mg tablet | Drugs for dementia |
| Read codes (version 2) | dy14. | Aricept 10mg tablet | Drugs for dementia |
| Read codes (version 2) | dy15. | ARICEPT EVESS 5mg disp tabs | Drugs for dementia |
| Read codes (version 2) | dy16. | ARICEPT EVESS 10mg disp tabs | Drugs for dementia |
| Read codes (version 2) | dy1y. | DONEPEZIL HCL 10mg disp tabs | Drugs for dementia |
| Read codes (version 2) | dy1z. | DONEPEZIL HCL 5mg disp tabs | Drugs for dementia |
| Read codes (version 2) | dy3.. | Galantamine | Drugs for dementia |
| Read codes (version 2) | dy31. | Reminyl 4mg tablet | Drugs for dementia |
| Read codes (version 2) | dy32. | Reminyl 8mg tablet | Drugs for dementia |
| Read codes (version 2) | dy33. | Reminyl 12mg tablet | Drugs for dementia |
| Read codes (version 2) | dy34. | Reminyl 4mg/mL s/f oral soln | Drugs for dementia |
| Read codes (version 2) | dy35. | Reminyl XL 8mg m/r capsule | Drugs for dementia |
| Read codes (version 2) | dy36. | Reminyl XL 16mg m/r capsule | Drugs for dementia |
| Read codes (version 2) | dy37. | Reminyl XL 24mg m/r capsule | Drugs for dementia |
| Read codes (version 2) | dy38. | GALSYA XL 8mg m/r capsules | Drugs for dementia |
| Read codes (version 2) | dy39. | GALSYA XL 16mg m/r capsules | Drugs for dementia |
| Read codes (version 2) | dy3A. | GALSYA XL 24mg m/r capsules | Drugs for dementia |
| Read codes (version 2) | dy3B. | ACUMOR XL 8mg m/r capsules | Drugs for dementia |
| Read codes (version 2) | dy3C. | ACUMOR XL 16mg m/r capsules | Drugs for dementia |
| Read codes (version 2) | dy3D. | ACUMOR XL 24mg m/r capsules | Drugs for dementia |
| Read codes (version 2) | dy3E. | LOTPROSIN XL 8mg m/r capsules | Drugs for dementia |
| Read codes (version 2) | dy3F. | LOTPROSIN XL 16mg m/r capsules | Drugs for dementia |
| Read codes (version 2) | dy3G. | LOTPROSIN XL 24mg m/r capsules | Drugs for dementia |
| Read codes (version 2) | dy3H. | ELMINO XL 8mg m/r capsules | Drugs for dementia |
| Read codes (version 2) | dy3I. | ELMINO XL 16mg m/r capsules | Drugs for dementia |
| Read codes (version 2) | dy3J. | ELMINO XL 24mg m/r capsules | Drugs for dementia |
| Read codes (version 2) | dy3K. | LUVENTA XL 8mg m/r capsules | Drugs for dementia |
| Read codes (version 2) | dy3L. | LUVENTA XL 16mg m/r capsules | Drugs for dementia |
| Read codes (version 2) | dy3M. | LUVENTA XL 24mg m/r capsules | Drugs for dementia |
| Read codes (version 2) | dy3t. | Galantamine 8mg m/r capsule | Drugs for dementia |
| Read codes (version 2) | dy3u. | Galantamine 16mg m/r capsule | Drugs for dementia |
| Read codes (version 2) | dy3v. | Galantamine 24mg m/r capsule | Drugs for dementia |
| Read codes (version 2) | dy3w. | Galantamine 4mg/mL s/f soln | Drugs for dementia |
| Read codes (version 2) | dy3x. | Galantamine 4mg tablet | Drugs for dementia |
| Read codes (version 2) | dy3y. | Galantamine 8mg tablet | Drugs for dementia |
| Read codes (version 2) | dy3z. | Galantamine 12mg tablet | Drugs for dementia |
| Read codes (version 2) | dB1.. | Memantine Hydrochloride | Drugs for dementia |
| Read codes (version 2) | dB11. | Memantine HCl 10mg tablet | Drugs for dementia |
| Read codes (version 2) | dB12. | Memantine HCl 10mg/g oral dps | Drugs for dementia |
| Read codes (version 2) | dB13. | Ebixa 10mg tablet | Drugs for dementia |
| Read codes (version 2) | dB14. | Ebixa 10mg/g oral drops | Drugs for dementia |
| Read codes (version 2) | dB15. | EBIXA 20mg tablets | Drugs for dementia |
| Read codes (version 2) | dB16. | MEMANTINE HCL 20mg tablets | Drugs for dementia |
| Read codes (version 2) | dB17. | EBIXA TREATMENT INIT PACK tabs | Drugs for dementia |
| Read codes (version 2) | dB18. | NEMDATINE 10mg tablets | Drugs for dementia |
| Read codes (version 2) | dB19. | NEMDATINE 20mg tablets | Drugs for dementia |
| Read codes (version 2) | dy2.. | Rivastigmine | Drugs for dementia |
| Read codes (version 2) | dy21. | Rivastigmine 1.5mg capsule | Drugs for dementia |
| Read codes (version 2) | dy22. | Rivastigmine 3mg capsule | Drugs for dementia |
| Read codes (version 2) | dy23. | Rivastigmine 4.5mg capsule | Drugs for dementia |
| Read codes (version 2) | dy24. | Rivastigmine 6mg capsule | Drugs for dementia |
| Read codes (version 2) | dy25. | Exelon 1.5mg capsule | Drugs for dementia |
| Read codes (version 2) | dy26. | Exelon 3mg capsule | Drugs for dementia |
| Read codes (version 2) | dy27. | Exelon 4.5mg capsule | Drugs for dementia |
| Read codes (version 2) | dy28. | Exelon 6mg capsule | Drugs for dementia |
| Read codes (version 2) | dy29. | Rivastigmine 2mg/mL oral soln | Drugs for dementia |
| Read codes (version 2) | dy2A. | Exelon 2mg/mL oral solution | Drugs for dementia |
| Read codes (version 2) | dy2B. | EXELON 4.6mg/24hrs patches | Drugs for dementia |
| Read codes (version 2) | dy2C. | EXELON 9.5mg/24hrs patches | Drugs for dementia |
| Read codes (version 2) | dy2D. | RIVASTIGMINE 4.6mg/24h patches | Drugs for dementia |
| Read codes (version 2) | dy2E. | RIVASTIGMINE 9.5mg/24h patches | Drugs for dementia |
| Read codes (version 2) | dy2F. | NIMVASTID 1.5mg capsules | Drugs for dementia |
| Read codes (version 2) | dy2G. | NIMVASTID 3mg capsules | Drugs for dementia |
| Read codes (version 2) | dy2H. | NIMVASTID 4.5mg capsules | Drugs for dementia |
| Read codes (version 2) | dy2I. | NIMVASTID 6mg capsules | Drugs for dementia |
| Read codes (version 2) | dy2J. | EXELON 13.3mg/24hrs patches | Drugs for dementia |
| Read codes (version 2) | dy2K. | RIVASTIGMINE 13.3mg/24hr patch | Drugs for dementia |
| Read codes (version 2) | dy2L. | ALZEST 4.6mg/24hours patches | Drugs for dementia |
| Read codes (version 2) | dy2M. | ALZEST 9.5mg/24hours patches | Drugs for dementia |
| Read codes (version 2) | dy2N. | PROMETAX 4.6mg/24hrs patches | Drugs for dementia |
| Read codes (version 2) | dy2O. | PROMETAX 9.5mg/24hrs patches | Drugs for dementia |
| Read codes (version 2) | dy2P. | SOMNITON 4.6mg/24hrs patches | Drugs for dementia |
| Read codes (version 2) | dy2Q. | SOMNITON 9.5mg/24hrs patches | Drugs for dementia |
| Read codes (version 2) | dy2R. | VOLEZE 4.6mg/24hours patches | Drugs for dementia |
| Read codes (version 2) | dy2S. | VOLEZE 9.5mg/24hours patches | Drugs for dementia |
| Read codes (version 2) | dy2T. | VOLEZE 13.3mg/24hours patches | Drugs for dementia |
| Read codes (version 2) | dy2U. | ELUDEN 4.6mg/24hours patches | Drugs for dementia |
| Read codes (version 2) | dy2V. | ELUDEN 9.5mg/24hours patches | Drugs for dementia |
| Codes used to identify cardiovascular events in hospital data | | | |
| ICD-10 | 120 | Angina pectoris | Ischaemic heart diseases |
| ICD-10 | I20.0 | Unstable angina | Ischaemic heart diseases |
| ICD-10 | I20.1 | Angina pectoris with documented spasm | Ischaemic heart diseases |
| ICD-10 | I20.8 | Other forms of angina pectoris | Ischaemic heart diseases |
| ICD-10 | I20.9 | Angina pectoris, unspecified | Ischaemic heart diseases |
| ICD-10 | 121 | Acute myocardial infarction | Ischaemic heart diseases |
| ICD-10 | I21.0 | Acute transmural myocardial infarction of anterior wall | Ischaemic heart diseases |
| ICD-10 | I21.1 | Acute transmural myocardial infarction of inferior wall | Ischaemic heart diseases |
| ICD-10 | I21.2 | Acute transmural myocardial infarction of other sites | Ischaemic heart diseases |
| ICD-10 | I21.3 | Acute transmural myocardial infarction of unspecified site | Ischaemic heart diseases |
| ICD-10 | I21.4 | Acute subendocardial myocardial infarction | Ischaemic heart diseases |
| ICD-10 | I21.9 | Acute myocardial infarction, unspecified | Ischaemic heart diseases |
| ICD-10 | 122 | Subsequent myocardial infarction | Ischaemic heart diseases |
| ICD-10 | I22.0 | Subsequent myocardial infarction of anterior wall | Ischaemic heart diseases |
| ICD-10 | I22.1 | Subsequent myocardial infarction of inferior wall | Ischaemic heart diseases |
| ICD-10 | I22.8 | Subsequent myocardial infarction of other sites | Ischaemic heart diseases |
| ICD-10 | I22.9 | Subsequent myocardial infarction of unspecified site | Ischaemic heart diseases |
| ICD-10 | I23 | Certain current complications following acute myocardial infarction | Ischaemic heart diseases |
| ICD-10 | I23.0 | Haemopericardium as current complication following acute myocardial infarction | Ischaemic heart diseases |
| ICD-10 | I23.1 | Atrial septal defect as current complication following acute myocardial infarction | Ischaemic heart diseases |
| ICD-10 | I23.2 | Ventricular septal defect as current complication following acute myocardial infarction | Ischaemic heart diseases |
| ICD-10 | I23.3 | Rupture of cardiac wall without haemopericardium as current complication following acute myocardial | Ischaemic heart diseases |
| ICD-10 | I23.4 | Rupture of chordae tendineae as current complication following acute myocardial infarction | Ischaemic heart diseases |
| ICD-10 | I23.5 | Rupture of papillary muscle as current complication following acute myocardial infarction | Ischaemic heart diseases |
| ICD-10 | I23.6 | Thrombosis of atrium, auricular appendage, and ventricle as current complications following acute my | Ischaemic heart diseases |
| ICD-10 | I23.8 | Other current complications following acute myocardial infarction | Ischaemic heart diseases |
| ICD-10 | 124 | Other acute ischaemic heart diseases | Ischaemic heart diseases |
| ICD-10 | I24.0 | Coronary thrombosis not resulting in myocardial infarction | Ischaemic heart diseases |
| ICD-10 | I24.1 | Dressler syndrome | Ischaemic heart diseases |
| ICD-10 | I24.8 | Other forms of acute ischaemic heart disease | Ischaemic heart diseases |
| ICD-10 | I24.9 | Acute ischaemic heart disease, unspecified | Ischaemic heart diseases |
| ICD-10 | I45.6 | pre-excitation syndrome | Arrhythmia |
| ICD-10 | I47 | paroxysmal tachycardia | Arrhythmia |
| ICD-10 | I47.0 | re-entry ventricular arrhythmia | Arrhythmia |
| ICD-10 | I47.1 | supraventricular tachycardia | Arrhythmia |
| ICD-10 | I47.2 | ventricular tachycardia | Arrhythmia |
| ICD-10 | I47.9 | "paroxysmal tachycardia, unspecified" | Arrhythmia |
| ICD-10 | I48 | atrial fibrillation and flutter | Arrhythmia |
| ICD-10 | I49 | other cardiac arrhythmias | Arrhythmia |
| ICD-10 | I49.0 | ventricular fibrillation and flutter | Arrhythmia |
| ICD-10 | I49.1 | atrial premature depolarization | Arrhythmia |
| ICD-10 | I49.2 | junctional premature depolarization | Arrhythmia |
| ICD-10 | I49.3 | ventricular premature depolarization | Arrhythmia |
| ICD-10 | I49.4 | other and unspecified premature depolarization | Arrhythmia |
| ICD-10 | I49.5 | sick sinus syndrome | Arrhythmia |
| ICD-10 | R00.0 | "tachycardia, unspecified" | Arrhythmia |
| ICD-10 | 150 | Heart failure | Heart failure |
| ICD-10 | I50.0 | Congestive heart failure | Heart failure |
| ICD-10 | I50.1 | Left ventricular failure | Heart failure |
| ICD-10 | I50.9 | Heart failure, unspecified | Heart failure |
| ICD-10 | 160 | Subarachnoid haemorrhage | Stroke |
| ICD-10 | I60.0 | Subarachnoid haemorrhage from carotid siphon and bifurcation | Stroke |
| ICD-10 | I60.1 | Subarachnoid haemorrhage from middle cerebral artery | Stroke |
| ICD-10 | I60.2 | Subarachnoid haemorrhage from anterior communicating artery | Stroke |
| ICD-10 | I60.3 | Subarachnoid haemorrhage from posterior communicating artery | Stroke |
| ICD-10 | I60.4 | Subarachnoid haemorrhage from basilar artery | Stroke |
| ICD-10 | I60.5 | Subarachnoid haemorrhage from vertebral artery | Stroke |
| ICD-10 | I60.6 | Subarachnoid haemorrhage from other intracranial arteries | Stroke |
| ICD-10 | I60.7 | Subarachnoid haemorrhage from intracranial artery, unspecified | Stroke |
| ICD-10 | I60.8 | Other subarachnoid haemorrhage | Stroke |
| ICD-10 | I60.9 | Subarachnoid haemorrhage, unspecified | Stroke |
| ICD-10 | 161 | Intracerebral haemorrhage | Stroke |
| ICD-10 | I61.0 | Intracerebral haemorrhage in hemisphere, subcortical | Stroke |
| ICD-10 | I61.1 | Intracerebral haemorrhage in hemisphere, cortical | Stroke |
| ICD-10 | I61.2 | Intracerebral haemorrhage in hemisphere, unspecified | Stroke |
| ICD-10 | I61.3 | Intracerebral haemorrhage in brain stem | Stroke |
| ICD-10 | I61.4 | Intracerebral haemorrhage in cerebellum | Stroke |
| ICD-10 | I61.5 | Intracerebral haemorrhage, intraventricular | Stroke |
| ICD-10 | I61.6 | Intracerebral haemorrhage, multiple localized | Stroke |
| ICD-10 | I61.8 | Other intracerebral haemorrhage | Stroke |
| ICD-10 | I61.9 | Intracerebral haemorrhage, unspecified | Stroke |
| ICD-10 | 162 | Other nontraumatic intracranial haemorrhage | Stroke |
| ICD-10 | I62.0 | Subdural haemorrhage (acute)(nontraumatic) | Stroke |
| ICD-10 | I62.1 | Nontraumatic extradural haemorrhage | Stroke |
| ICD-10 | I62.9 | Intracranial haemorrhage (nontraumatic), unspecified | Stroke |
| ICD-10 | 163 | Cerebral infarction | Stroke |
| ICD-10 | I63.0 | Cerebral infarction due to thrombosis of precerebral arteries | Stroke |
| ICD-10 | I63.1 | Cerebral infarction due to embolism of precerebral arteries | Stroke |
| ICD-10 | I63.2 | Cerebral infarction due to unspecified occlusion or stenosis of precerebral arteries | Stroke |
| ICD-10 | 163.3 | Cerebral infarction due to thrombosis of cerebral arteries | Stroke |
| ICD-10 | 163.4 | Cerebral infarction due to embolism of cerebral arteries | Stroke |
| ICD-10 | 163.5 | Cerebral infarction due to unspecified occlusion or stenosis of cerebral arteries | Stroke |
| ICD-10 | 163.6 | Cerebral infarction due to cerebral venous thrombosis, nonpyogenic | Stroke |
| ICD-10 | 163.8 | Other cerebral infarction | Stroke |
| ICD-10 | 163.9 | Cerebral infarction, unspecified | Stroke |
| ICD-10 | 164 | Stroke, not specified as haemorrhage or infarction | Stroke |
| ICD-10 | 165 | Occlusion and stenosis of precerebral arteries, not resulting in cerebral infarction | Stroke |
| ICD-10 | I65.0 | Occlusion and stenosis of vertebral artery | Stroke |
| ICD-10 | I65.1 | Occlusion and stenosis of basilar artery | Stroke |
| ICD-10 | I65.2 | Occlusion and stenosis of carotid artery | Stroke |
| ICD-10 | I65.3 | Occlusion and stenosis of multiple and bilateral precerebral arteries | Stroke |
| ICD-10 | I65.8 | Occlusion and stenosis of other precerebral artery | Stroke |
| ICD-10 | I65.9 | Occlusion and stenosis of unspecified precerebral artery | Stroke |
| ICD-10 | 166 | Occlusion and stenosis of cerebral arteries, not resulting in cerebral infarction | Stroke |
| ICD-10 | I66.0 | Occlusion and stenosis of middle cerebral artery | Stroke |
| ICD-10 | 166.1 | Occlusion and stenosis of anterior cerebral artery | Stroke |
| ICD-10 | 166.2 | Occlusion and stenosis of posterior cerebral artery | Stroke |
| ICD-10 | 166.3 | Occlusion and stenosis of cerebellar arteries | Stroke |
| ICD-10 | 166.4 | Occlusion and stenosis of multiple and bilateral cerebral arteries | Stroke |
| ICD-10 | 166.8 | Occlusion and stenosis of other cerebral artery | Stroke |
| ICD-10 | 166.9 | Occlusion and stenosis of unspecified cerebral artery | Stroke |
| Codes used to identify the smoking and hypertension status | | | |
| Read codes (version 2) | G2...00 | Hypertensive disease | Hypertension |
| Read codes (version 2) | G20..00 | Essential hypertension | Hypertension |
| Read codes (version 2) | G200.00 | Malignant essential hypertension | Hypertension |
| Read codes (version 2) | G201.00 | Benign essential hypertension | Hypertension |
| Read codes (version 2) | G20..11 | High blood pressure | Hypertension |
| Read codes (version 2) | G202.00 | Systolic hypertension | Hypertension |
| Read codes (version 2) | G203.00 | Diastolic hypertension | Hypertension |
| Read codes (version 2) | G20z.00 | Essential hypertension NOS | Hypertension |
| Read codes (version 2) | G20z.11 | Hypertension NOS | Hypertension |
| Read codes (version 2) | G24..00 | Secondary hypertension | Hypertension |
| Read codes (version 2) | G240.00 | Secondary malignant hypertension | Hypertension |
| Read codes (version 2) | G240000 | Secondary malignant renovascular hypertension | Hypertension |
| Read codes (version 2) | G240z00 | Secondary malignant hypertension NOS | Hypertension |
| Read codes (version 2) | G241.00 | Secondary benign hypertension | Hypertension |
| Read codes (version 2) | G241000 | Secondary benign renovascular hypertension | Hypertension |
| Read codes (version 2) | G241z00 | Secondary benign hypertension NOS | Hypertension |
| Read codes (version 2) | G244.00 | Hypertension secondary to endocrine disorders | Hypertension |
| Read codes (version 2) | G24z.00 | Secondary hypertension NOS | Hypertension |
| Read codes (version 2) | G24z000 | Secondary renovascular hypertension NOS | Hypertension |
| Read codes (version 2) | G24z100 | Hypertension secondary to drug | Hypertension |
| Read codes (version 2) | G24zz00 | Secondary hypertension NOS | Hypertension |
| Read codes (version 2) | G2y..00 | Other specified hypertensive disease | Hypertension |
| Read codes (version 2) | G2z..00 | Hypertensive disease NOS | Hypertension |
| Read codes (version 2) | Gyu2.00 | [X]Hypertensive diseases | Hypertension |
| Read codes (version 2) | Gyu2000 | [X]Other secondary hypertension | Hypertension |
| Read codes (version 2) | 1371 | Never smoked tobacco | Never-smoker |
| Read codes (version 2) | 9kn.. | Non-smoker annual review - enhanced services administration | Never-smoker |
| Charlson comorbidity index | | | |
| ICD-10 | I21.x, I22.x, I25.2 | Myocardial infarction | Charlson index |
| ICD-10 | I09.9,I11.0, I13.0, I13.2, I25.5, I42.0,  I42.5-I42.9, I43.x, I50.x, P29.0 | Congestive heart failure | Charlson index |
| ICD-10 | I70.x, I71.x, I73.1, I73.8, I73.9, I77.1, I79.0, I79.2, K55.1, K55.8, K55.9, Z95.8, Z95.9 | Peripheral vascular  disease | Charlson index |
| ICD-10 | G45.x, G46.x, H34.0, I60.x-I69.x | Cerebrovascular disease | Charlson index |
| ICD-10 | F00.x-F03.x, F05.1, G30.x, G31.1 | Dementia | Charlson index |
| ICD-10 | I27.8, I27.9, J40.x-J47.x, J60.x-J67.x, J68.4, J70.1, J70.3 | Chronic pulmonary disease | Charlson index |
| ICD-10 | M05.x, M06.x, M31.5, M32.x-M34.x, M35.1, M35.3, M36.0 | Rheumatic disease | Charlson index |
| ICD-10 | K25.x-K28.x | Peptic ulcer disease | Charlson index |
| ICD-10 | B18.x, K70.0-K70.3, K70.9,  K71.3-K71.5, K71.7, K73.x, K74.x, K76.0, K76.2-K76.4, K76.8, K76.9, Z94.4 | Mild liver disease | Charlson index |
| ICD-10 | E10.0, E10.l, E10.6, E10.8, E10.9, E11.0, E11.1, E11.6, E11.8, E11.9, E12.0, E12.1, E12.6, E12.8, E12.9, E13.0, E13.1, E13.6, E13.8, E13.9,  E14.0, E14.1, E14.6, E14.8, E14.9 | Diabetes | Charlson index |
| ICD-10 | E10.2-E10.5, E10.7, E11.2-E11.5, E11.7, E12.2-E12.5, E12.7, E13.2-E13.5, E13.7, E14.2-E14.5, E14.7 | Diabetes with chronic  complication | Charlson index |
| ICD-10 | G04.1, G11.4, G80.1, G80.2, G81.x, G82.x, G83.0-G83.4, G83.9 | Hemiplegia or paraplegia | Charlson index |
| ICD-10 | I12.0, I13.1, N03.2-N03.7,  N05.2-N05.7, N18.x, N19.x, N25.0, Z49.0-Z49.2, Z94.0, Z99.2 | Renal disease | Charlson index |
| ICD-10 | C00.x-C26.x, C30.x-C34.x, C37.x-C41.x, C43.x, C45.x-C58.x, C60.x-C76.x, C81.x-C85.x, C88.x, C90.x-C97. | Cancer | Charlson index |
| ICD-10 | I85.0, I85.9, I86.4, I98.2, K70.4, K71.1, K72.1, K72.9, K76.5, K76.6, K76.7 | Moderate or severe liver  disease | Charlson index |
| ICD-10 | C77.x-C80.x | Metastatic solid tumor | Charlson index |

**APPENDIX 2.** List of antipsychotics used by PD patients in the study (drugs with less than 5 cells were excluded)

| **First Generation Antipsychotics** | **Second Generation Antipsychotics** |
| --- | --- |
| Haloperidol (FSA) | Amisulpride |
| Levomepromazine (FGA) | Aripiprazole |
| Periciazine (FSA) | Olanzapine |
| Promazine (FSA) | Quetiapine |
|  | Risperidone |

**APPENDIX 3.** List of health boards in Wales.

| **Health board (geographical health board location)** |
| --- |
| Abertawe Bro Morgannwg | |
| Aneurin Bevan | |
| Betsi Cadwaladr | |
| Cardiff & Vale | |
| Cwm Taf | |
| Hywel Dda | |
| Powys | |
